# Supplementary material for: Wide range of G6PD activities found among ethnic groups of the Chittagong Hill Tracts, Bangladesh
Source: PLoS Negl Trop Dis. 2020 Sep 14;14(9):e0008697. doi: 10.1371/journal.pntd.0008697 (PMC7514097; doi:10.1371/journal.pntd.0008697)
Supplement: S1 File — (XLSX) [file pntd.0008697.s004.xlsx]

## Sheet: Sheet1
Date: 22/08/2015 Marma Group, Chorai Para, Kuhalong
Vill	ID	Village name	Village	Union	Upazila	Total HH
01	01	Chorai Para, Kuhalong	Chorai Para	Kuhalong	Bandarban Sadar	60
01	02	Chorai Para, Kuhalong	Chorai Para	Kuhalong	Bandarban Sadar
01	03	Chorai Para, Kuhalong	Chorai Para	Kuhalong	Bandarban Sadar
01	04	Chorai Para, Kuhalong	Chorai Para	Kuhalong	Bandarban Sadar
01	05	Chorai Para, Kuhalong	Chorai Para	Kuhalong	Bandarban Sadar
01	06	Chorai Para, Kuhalong	Chorai Para	Kuhalong	Bandarban Sadar
01	07	Chorai Para, Kuhalong	Chorai Para	Kuhalong	Bandarban Sadar
01	08	Chorai Para, Kuhalong	Chorai Para	Kuhalong	Bandarban Sadar
01	09	Chorai Para, Kuhalong	Chorai Para	Kuhalong	Bandarban Sadar
01	10	Chorai Para, Kuhalong	Chorai Para	Kuhalong	Bandarban Sadar
01	11	Chorai Para, Kuhalong	Chorai Para	Kuhalong	Bandarban Sadar
01	12	Chorai Para, Kuhalong	Chorai Para	Kuhalong	Bandarban Sadar
01	13	Chorai Para, Kuhalong	Chorai Para	Kuhalong	Bandarban Sadar
01	14	Chorai Para, Kuhalong	Chorai Para	Kuhalong	Bandarban Sadar
01	15	Chorai Para, Kuhalong	Chorai Para	Kuhalong	Bandarban Sadar
01	16	Chorai Para, Kuhalong	Chorai Para	Kuhalong	Bandarban Sadar
01	17	Chorai Para, Kuhalong	Chorai Para	Kuhalong	Bandarban Sadar
01	18	Chorai Para, Kuhalong	Chorai Para	Kuhalong	Bandarban Sadar
01	19	Chorai Para, Kuhalong	Chorai Para	Kuhalong	Bandarban Sadar
01	20	Chorai Para, Kuhalong	Chorai Para	Kuhalong	Bandarban Sadar
01	21	Chorai Para, Kuhalong	Chorai Para	Kuhalong	Bandarban Sadar
01	22	Chorai Para, Kuhalong	Chorai Para	Kuhalong	Bandarban Sadar
01	23	Chorai Para, Kuhalong	Chorai Para	Kuhalong	Bandarban Sadar
01	24	Chorai Para, Kuhalong	Chorai Para	Kuhalong	Bandarban Sadar
01	25	Chorai Para, Kuhalong	Chorai Para	Kuhalong	Bandarban Sadar
Date: 23/08/2015 Marma Group, Thoyangyo Para, Kuhalong
Vill	ID	Village name	Thoyangyo Para	Kuhalong	Bandarban Sadar	103
02	01	Thoyangyo Para, Kuhalong	Thoyangyo Para	Kuhalong	Bandarban Sadar
02	02	Thoyangyo Para, Kuhalong	Thoyangyo Para	Kuhalong	Bandarban Sadar
02	03	Thoyangyo Para, Kuhalong	Thoyangyo Para	Kuhalong	Bandarban Sadar
02	04	Thoyangyo Para, Kuhalong	Thoyangyo Para	Kuhalong	Bandarban Sadar
02	05	Thoyangyo Para, Kuhalong	Thoyangyo Para	Kuhalong	Bandarban Sadar
02	06	Thoyangyo Para, Kuhalong	Thoyangyo Para	Kuhalong	Bandarban Sadar
02	07	Thoyangyo Para, Kuhalong	Thoyangyo Para	Kuhalong	Bandarban Sadar
02	08	Thoyangyo Para, Kuhalong	Thoyangyo Para	Kuhalong	Bandarban Sadar
02	09	Thoyangyo Para, Kuhalong	Thoyangyo Para	Kuhalong	Bandarban Sadar
02	10	Thoyangyo Para, Kuhalong	Thoyangyo Para	Kuhalong	Bandarban Sadar
02	11	Thoyangyo Para, Kuhalong	Thoyangyo Para	Kuhalong	Bandarban Sadar
02	12	Thoyangyo Para, Kuhalong	Thoyangyo Para	Kuhalong	Bandarban Sadar
02	13	Thoyangyo Para, Kuhalong	Thoyangyo Para	Kuhalong	Bandarban Sadar
02	14	Thoyangyo Para, Kuhalong	Thoyangyo Para	Kuhalong	Bandarban Sadar
02	15	Thoyangyo Para, Kuhalong	Thoyangyo Para	Kuhalong	Bandarban Sadar
02	16	Thoyangyo Para, Kuhalong	Thoyangyo Para	Kuhalong	Bandarban Sadar
02	17	Thoyangyo Para, Kuhalong	Thoyangyo Para	Kuhalong	Bandarban Sadar
02	18	Thoyangyo Para, Kuhalong	Thoyangyo Para	Kuhalong	Bandarban Sadar
02	19	Thoyangyo Para, Kuhalong	Thoyangyo Para	Kuhalong	Bandarban Sadar
02	20	Thoyangyo Para, Kuhalong	Thoyangyo Para	Kuhalong	Bandarban Sadar
02	21	Thoyangyo Para, Kuhalong	Thoyangyo Para	Kuhalong	Bandarban Sadar
02	22	Thoyangyo Para, Kuhalong	Thoyangyo Para	Kuhalong	Bandarban Sadar
02	23	Thoyangyo Para, Kuhalong	Thoyangyo Para	Kuhalong	Bandarban Sadar
02	24	Thoyangyo Para, Kuhalong	Thoyangyo Para	Kuhalong	Bandarban Sadar
02	25	Thoyangyo Para, Kuhalong	Thoyangyo Para	Kuhalong	Bandarban Sadar
Date: 24/08/2015 ,Taungchangya Group, Koia Toli Purbo, Kuhalong
Vill	ID	Village name
03	01	Koia Toli Purbo, Kuhalong	Koiuyatoli Purbo and Koiuyatoli Poshim	Kuhalong	Bandarban Sadar	48
03	02	Koia Toli Purbo, Kuhalong	Koiuyatoli Purbo and Koiuyatoli Poshim	Kuhalong	Bandarban Sadar
03	03	Koia Toli Purbo, Kuhalong	Koiuyatoli Purbo and Koiuyatoli Poshim	Kuhalong	Bandarban Sadar
03	04	Koia Toli Purbo, Kuhalong	Koiuyatoli Purbo and Koiuyatoli Poshim	Kuhalong	Bandarban Sadar
03	05	Koia Toli Purbo, Kuhalong	Koiuyatoli Purbo and Koiuyatoli Poshim	Kuhalong	Bandarban Sadar
03	06	Koia Toli Purbo, Kuhalong	Koiuyatoli Purbo and Koiuyatoli Poshim	Kuhalong	Bandarban Sadar
03	07	Koia Toli Purbo, Kuhalong	Koiuyatoli Purbo and Koiuyatoli Poshim	Kuhalong	Bandarban Sadar
03	08	Koia Toli Purbo, Kuhalong	Koiuyatoli Purbo and Koiuyatoli Poshim	Kuhalong	Bandarban Sadar
03	09	Koia Toli Purbo, Kuhalong	Koiuyatoli Purbo and Koiuyatoli Poshim	Kuhalong	Bandarban Sadar
03	10	Koia Toli Purbo, Kuhalong	Koiuyatoli Purbo and Koiuyatoli Poshim	Kuhalong	Bandarban Sadar
03	11	Koia Toli Purbo, Kuhalong	Koiuyatoli Purbo and Koiuyatoli Poshim	Kuhalong	Bandarban Sadar
03	12	Koia Toli Purbo, Kuhalong	Koiuyatoli Purbo and Koiuyatoli Poshim	Kuhalong	Bandarban Sadar
03	13	Koia Toli Purbo, Kuhalong	Koiuyatoli Purbo and Koiuyatoli Poshim	Kuhalong	Bandarban Sadar
03	14	Koia Toli Purbo, Kuhalong	Koiuyatoli Purbo and Koiuyatoli Poshim	Kuhalong	Bandarban Sadar
03	15	Koia Toli Purbo, Kuhalong	Koiuyatoli Purbo and Koiuyatoli Poshim	Kuhalong	Bandarban Sadar
03	16	Koia Toli Purbo, Kuhalong	Koiuyatoli Purbo and Koiuyatoli Poshim	Kuhalong	Bandarban Sadar
03	17	Koia Toli Purbo, Kuhalong	Koiuyatoli Purbo and Koiuyatoli Poshim	Kuhalong	Bandarban Sadar
03	18	Koia Toli Purbo, Kuhalong	Koiuyatoli Purbo and Koiuyatoli Poshim	Kuhalong	Bandarban Sadar
03	19	Koia Toli Purbo, Kuhalong	Koiuyatoli Purbo and Koiuyatoli Poshim	Kuhalong	Bandarban Sadar
03	20	Koia Toli Purbo, Kuhalong	Koiuyatoli Purbo and Koiuyatoli Poshim	Kuhalong	Bandarban Sadar
03	21	Koia Toli Purbo, Kuhalong	Koiuyatoli Purbo and Koiuyatoli Poshim	Kuhalong	Bandarban Sadar
03	22	Koia Toli Purbo, Kuhalong	Koiuyatoli Purbo and Koiuyatoli Poshim	Kuhalong	Bandarban Sadar
03	23	Koia Toli Purbo, Kuhalong	Koiuyatoli Purbo and Koiuyatoli Poshim	Kuhalong	Bandarban Sadar
03	24	Koia Toli Purbo, Kuhalong	Koiuyatoli Purbo and Koiuyatoli Poshim	Kuhalong	Bandarban Sadar
Date: 25/08/2015 Taungchangya Group, Koia Toli Paschim, Kuhalong
Vill	ID	Village name
04	01	Koia Toli Paschim, Kuhalong	Koiuyatoli Purbo and Koiuyatoli Poshim	Kuhalong	Bandarban Sadar	37
04	02	Koia Toli Paschim, Kuhalong	Koiuyatoli Purbo and Koiuyatoli Poshim	Kuhalong	Bandarban Sadar
04	03	Koia Toli Paschim, Kuhalong	Koiuyatoli Purbo and Koiuyatoli Poshim	Kuhalong	Bandarban Sadar
04	04	Koia Toli Paschim, Kuhalong	Koiuyatoli Purbo and Koiuyatoli Poshim	Kuhalong	Bandarban Sadar
04	05	Koia Toli Paschim, Kuhalong	Koiuyatoli Purbo and Koiuyatoli Poshim	Kuhalong	Bandarban Sadar
04	06	Koia Toli Paschim, Kuhalong	Koiuyatoli Purbo and Koiuyatoli Poshim	Kuhalong	Bandarban Sadar
04	07	Koia Toli Paschim, Kuhalong	Koiuyatoli Purbo and Koiuyatoli Poshim	Kuhalong	Bandarban Sadar
04	08	Koia Toli Paschim, Kuhalong	Koiuyatoli Purbo and Koiuyatoli Poshim	Kuhalong	Bandarban Sadar
04	09	Koia Toli Paschim, Kuhalong	Koiuyatoli Purbo and Koiuyatoli Poshim	Kuhalong	Bandarban Sadar
04	10	Koia Toli Paschim, Kuhalong	Koiuyatoli Purbo and Koiuyatoli Poshim	Kuhalong	Bandarban Sadar
04	11	Koia Toli Paschim, Kuhalong	Koiuyatoli Purbo and Koiuyatoli Poshim	Kuhalong	Bandarban Sadar
04	12	Koia Toli Paschim, Kuhalong	Koiuyatoli Purbo and Koiuyatoli Poshim	Kuhalong	Bandarban Sadar
04	13	Koia Toli Paschim, Kuhalong	Koiuyatoli Purbo and Koiuyatoli Poshim	Kuhalong	Bandarban Sadar
04	14	Koia Toli Paschim, Kuhalong	Koiuyatoli Purbo and Koiuyatoli Poshim	Kuhalong	Bandarban Sadar
04	15	Koia Toli Paschim, Kuhalong	Koiuyatoli Purbo and Koiuyatoli Poshim	Kuhalong	Bandarban Sadar
04	16	Koia Toli Paschim, Kuhalong	Koiuyatoli Purbo and Koiuyatoli Poshim	Kuhalong	Bandarban Sadar
04	17	Koia Toli Paschim, Kuhalong	Koiuyatoli Purbo and Koiuyatoli Poshim	Kuhalong	Bandarban Sadar
04	18	Koia Toli Paschim, Kuhalong	Koiuyatoli Purbo and Koiuyatoli Poshim	Kuhalong	Bandarban Sadar
04	19	Koia Toli Paschim, Kuhalong	Koiuyatoli Purbo and Koiuyatoli Poshim	Kuhalong	Bandarban Sadar
04	20	Koia Toli Paschim, Kuhalong	Koiuyatoli Purbo and Koiuyatoli Poshim	Kuhalong	Bandarban Sadar
04	21	Koia Toli Paschim, Kuhalong	Koiuyatoli Purbo and Koiuyatoli Poshim	Kuhalong	Bandarban Sadar
04	22	Koia Toli Paschim, Kuhalong	Koiuyatoli Purbo and Koiuyatoli Poshim	Kuhalong	Bandarban Sadar
Date: 29/08/2015 Chakma Group, Chakma Para, Rajbila
Vill	ID	Village name
05	01	Chakma Para, Rajbila	Chakma Para	Rajbila	Bandarban Sadar	60
05	02	Chakma Para, Rajbila	Chakma Para	Rajbila	Bandarban Sadar
05	03	Chakma Para, Rajbila	Chakma Para	Rajbila	Bandarban Sadar
05	04	Chakma Para, Rajbila	Chakma Para	Rajbila	Bandarban Sadar
05	05	Chakma Para, Rajbila	Chakma Para	Rajbila	Bandarban Sadar
05	06	Chakma Para, Rajbila	Chakma Para	Rajbila	Bandarban Sadar
05	07	Chakma Para, Rajbila	Chakma Para	Rajbila	Bandarban Sadar
05	08	Chakma Para, Rajbila	Chakma Para	Rajbila	Bandarban Sadar
05	09	Chakma Para, Rajbila	Chakma Para	Rajbila	Bandarban Sadar
05	10	Chakma Para, Rajbila	Chakma Para	Rajbila	Bandarban Sadar
05	11	Chakma Para, Rajbila	Chakma Para	Rajbila	Bandarban Sadar
05	12	Chakma Para, Rajbila	Chakma Para	Rajbila	Bandarban Sadar
05	13	Chakma Para, Rajbila	Chakma Para	Rajbila	Bandarban Sadar
05	14	Chakma Para, Rajbila	Chakma Para	Rajbila	Bandarban Sadar
05	15	Chakma Para, Rajbila	Chakma Para	Rajbila	Bandarban Sadar
05	16	Chakma Para, Rajbila	Chakma Para	Rajbila	Bandarban Sadar
05	17	Chakma Para, Rajbila	Chakma Para	Rajbila	Bandarban Sadar
05	18	Chakma Para, Rajbila	Chakma Para	Rajbila	Bandarban Sadar
05	19	Chakma Para, Rajbila	Chakma Para	Rajbila	Bandarban Sadar
05	20	Chakma Para, Rajbila	Chakma Para	Rajbila	Bandarban Sadar
05	21	Chakma Para, Rajbila	Chakma Para	Rajbila	Bandarban Sadar
05	22	Chakma Para, Rajbila	Chakma Para	Rajbila	Bandarban Sadar
05	23	Chakma Para, Rajbila	Chakma Para	Rajbila	Bandarban Sadar
05	24	Chakma Para, Rajbila	Chakma Para	Rajbila	Bandarban Sadar
05	25	Chakma Para, Rajbila	Chakma Para	Rajbila	Bandarban Sadar
Date: 30/08/2015 Chakma Group, Jogesh Para, Rajbila
Vill	ID	Village name
06	01	Jogesh Para, Rajbila	Lakshi Mohon Para and Chikka Para	Rajbila	Bandarban Sadar	51
06	02	Jogesh Para, Rajbila	Lakshi Mohon Para and Chikka Para	Rajbila	Bandarban Sadar
06	03	Jogesh Para, Rajbila	Lakshi Mohon Para and Chikka Para	Rajbila	Bandarban Sadar
06	04	Jogesh Para, Rajbila	Lakshi Mohon Para and Chikka Para	Rajbila	Bandarban Sadar
06	05	Jogesh Para, Rajbila	Lakshi Mohon Para and Chikka Para	Rajbila	Bandarban Sadar
06	06	Jogesh Para, Rajbila	Lakshi Mohon Para and Chikka Para	Rajbila	Bandarban Sadar
06	07	Jogesh Para, Rajbila	Lakshi Mohon Para and Chikka Para	Rajbila	Bandarban Sadar
06	08	Jogesh Para, Rajbila	Lakshi Mohon Para and Chikka Para	Rajbila	Bandarban Sadar
06	09	Jogesh Para, Rajbila	Lakshi Mohon Para and Chikka Para	Rajbila	Bandarban Sadar
06	10	Jogesh Para, Rajbila	Lakshi Mohon Para and Chikka Para	Rajbila	Bandarban Sadar
06	11	Jogesh Para, Rajbila	Lakshi Mohon Para and Chikka Para	Rajbila	Bandarban Sadar
06	12	Jogesh Para, Rajbila	Lakshi Mohon Para and Chikka Para	Rajbila	Bandarban Sadar
06	13	Jogesh Para, Rajbila	Lakshi Mohon Para and Chikka Para	Rajbila	Bandarban Sadar
06	14	Jogesh Para, Rajbila	Lakshi Mohon Para and Chikka Para	Rajbila	Bandarban Sadar
06	15	Jogesh Para, Rajbila	Lakshi Mohon Para and Chikka Para	Rajbila	Bandarban Sadar
06	16	Jogesh Para, Rajbila	Lakshi Mohon Para and Chikka Para	Rajbila	Bandarban Sadar
06	17	Jogesh Para, Rajbila	Lakshi Mohon Para and Chikka Para	Rajbila	Bandarban Sadar
06	18	Jogesh Para, Rajbila	Lakshi Mohon Para and Chikka Para	Rajbila	Bandarban Sadar
06	19	Jogesh Para, Rajbila	Lakshi Mohon Para and Chikka Para	Rajbila	Bandarban Sadar
06	20	Jogesh Para, Rajbila	Lakshi Mohon Para and Chikka Para	Rajbila	Bandarban Sadar
06	21	Jogesh Para, Rajbila	Lakshi Mohon Para and Chikka Para	Rajbila	Bandarban Sadar
06	22	Jogesh Para, Rajbila	Lakshi Mohon Para and Chikka Para	Rajbila	Bandarban Sadar
06	23	Jogesh Para, Rajbila	Lakshi Mohon Para and Chikka Para	Rajbila	Bandarban Sadar
06	24	Jogesh Para, Rajbila	Lakshi Mohon Para and Chikka Para	Rajbila	Bandarban Sadar
06	25	Jogesh Para, Rajbila	Lakshi Mohon Para and Chikka Para	Rajbila	Bandarban Sadar
Date: 31/08/2015 Tripura Group, Purbo Antaha Para, Noa Potong
Vill	ID	Village name
07	01	Purbo Antaha Para, Noa Potong	Antaha Para	Nowapatang	Rowangchhari	75
07	02	Purbo Antaha Para, Noa Potong	Antaha Para	Nowapatang	Rowangchhari
07	03	Purbo Antaha Para, Noa Potong	Antaha Para	Nowapatang	Rowangchhari
07	04	Purbo Antaha Para, Noa Potong	Antaha Para	Nowapatang	Rowangchhari
07	05	Purbo Antaha Para, Noa Potong	Antaha Para	Nowapatang	Rowangchhari
07	06	Purbo Antaha Para, Noa Potong	Antaha Para	Nowapatang	Rowangchhari
07	07	Purbo Antaha Para, Noa Potong	Antaha Para	Nowapatang	Rowangchhari
07	08	Purbo Antaha Para, Noa Potong	Antaha Para	Nowapatang	Rowangchhari
07	09	Purbo Antaha Para, Noa Potong	Antaha Para	Nowapatang	Rowangchhari
07	10	Purbo Antaha Para, Noa Potong	Antaha Para	Nowapatang	Rowangchhari
07	11	Purbo Antaha Para, Noa Potong	Antaha Para	Nowapatang	Rowangchhari
07	12	Purbo Antaha Para, Noa Potong	Antaha Para	Nowapatang	Rowangchhari
07	13	Purbo Antaha Para, Noa Potong	Antaha Para	Nowapatang	Rowangchhari
07	14	Purbo Antaha Para, Noa Potong	Antaha Para	Nowapatang	Rowangchhari
07	15	Purbo Antaha Para, Noa Potong	Antaha Para	Nowapatang	Rowangchhari
07	16	Purbo Antaha Para, Noa Potong	Antaha Para	Nowapatang	Rowangchhari
07	17	Purbo Antaha Para, Noa Potong	Antaha Para	Nowapatang	Rowangchhari
07	18	Purbo Antaha Para, Noa Potong	Antaha Para	Nowapatang	Rowangchhari
07	19	Purbo Antaha Para, Noa Potong	Antaha Para	Nowapatang	Rowangchhari
07	20	Purbo Antaha Para, Noa Potong	Antaha Para	Nowapatang	Rowangchhari
07	21	Purbo Antaha Para, Noa Potong	Antaha Para	Nowapatang	Rowangchhari
07	22	Purbo Antaha Para, Noa Potong	Antaha Para	Nowapatang	Rowangchhari
07	23	Purbo Antaha Para, Noa Potong	Antaha Para	Nowapatang	Rowangchhari
07	24	Purbo Antaha Para, Noa Potong	Antaha Para	Nowapatang	Rowangchhari
07	25	Purbo Antaha Para, Noa Potong	Antaha Para	Nowapatang	Rowangchhari
Dat: 01/09/2015 Tripura Group, Paschim Antaha Para, Noapotong
Vill	ID	Village name
08	01	Paschim Antaha Para, Noapotong	Antaha Para	Nowapatang	Rowangchhari	75
08	02	Paschim Antaha Para, Noapotong	Antaha Para	Nowapatang	Rowangchhari
08	03	Paschim Antaha Para, Noapotong	Antaha Para	Nowapatang	Rowangchhari
08	04	Paschim Antaha Para, Noapotong	Antaha Para	Nowapatang	Rowangchhari
08	05	Paschim Antaha Para, Noapotong	Antaha Para	Nowapatang	Rowangchhari
08	06	Paschim Antaha Para, Noapotong	Antaha Para	Nowapatang	Rowangchhari
08	07	Paschim Antaha Para, Noapotong	Antaha Para	Nowapatang	Rowangchhari
08	08	Paschim Antaha Para, Noapotong	Antaha Para	Nowapatang	Rowangchhari
08	09	Paschim Antaha Para, Noapotong	Antaha Para	Nowapatang	Rowangchhari
08	10	Paschim Antaha Para, Noapotong	Antaha Para	Nowapatang	Rowangchhari
08	11	Paschim Antaha Para, Noapotong	Antaha Para	Nowapatang	Rowangchhari
08	12	Paschim Antaha Para, Noapotong	Antaha Para	Nowapatang	Rowangchhari
08	13	Paschim Antaha Para, Noapotong	Antaha Para	Nowapatang	Rowangchhari
08	14	Paschim Antaha Para, Noapotong	Antaha Para	Nowapatang	Rowangchhari
08	15	Paschim Antaha Para, Noapotong	Antaha Para	Nowapatang	Rowangchhari
08	16	Paschim Antaha Para, Noapotong	Antaha Para	Nowapatang	Rowangchhari
08	17	Paschim Antaha Para, Noapotong	Antaha Para	Nowapatang	Rowangchhari
08	18	Paschim Antaha Para, Noapotong	Antaha Para	Nowapatang	Rowangchhari
08	19	Paschim Antaha Para, Noapotong	Antaha Para	Nowapatang	Rowangchhari
08	20	Paschim Antaha Para, Noapotong	Antaha Para	Nowapatang	Rowangchhari
08	21	Paschim Antaha Para, Noapotong	Antaha Para	Nowapatang	Rowangchhari
08	22	Paschim Antaha Para, Noapotong	Antaha Para	Nowapatang	Rowangchhari
08	23	Paschim Antaha Para, Noapotong	Antaha Para	Nowapatang	Rowangchhari
08	24	Paschim Antaha Para, Noapotong	Antaha Para	Nowapatang	Rowangchhari
08	25	Paschim Antaha Para, Noapotong	Antaha Para	Nowapatang	Rowangchhari
Date: 05/09/2015 Tripura Group, Jordan Para, Kuhalong
Vill	ID	Village name
09	01	Jordan Para, Kuhalong	Jordan Para	Kuhalong	Bandarban Sadar	32
09	02	Jordan Para, Kuhalong	Jordan Para	Kuhalong	Bandarban Sadar
09	03	Jordan Para, Kuhalong	Jordan Para	Kuhalong	Bandarban Sadar
09	04	Jordan Para, Kuhalong	Jordan Para	Kuhalong	Bandarban Sadar
09	05	Jordan Para, Kuhalong	Jordan Para	Kuhalong	Bandarban Sadar
09	06	Jordan Para, Kuhalong	Jordan Para	Kuhalong	Bandarban Sadar
09	07	Jordan Para, Kuhalong	Jordan Para	Kuhalong	Bandarban Sadar
09	08	Jordan Para, Kuhalong	Jordan Para	Kuhalong	Bandarban Sadar
09	09	Jordan Para, Kuhalong	Jordan Para	Kuhalong	Bandarban Sadar
09	10	Jordan Para, Kuhalong	Jordan Para	Kuhalong	Bandarban Sadar
09	11	Jordan Para, Kuhalong	Jordan Para	Kuhalong	Bandarban Sadar
09	12	Jordan Para, Kuhalong	Jordan Para	Kuhalong	Bandarban Sadar
09	13	Jordan Para, Kuhalong	Jordan Para	Kuhalong	Bandarban Sadar
09	14	Jordan Para, Kuhalong	Jordan Para	Kuhalong	Bandarban Sadar
09	15	Jordan Para, Kuhalong	Jordan Para	Kuhalong	Bandarban Sadar
09	16	Jordan Para, Kuhalong	Jordan Para	Kuhalong	Bandarban Sadar
09	17	Jordan Para, Kuhalong	Jordan Para	Kuhalong	Bandarban Sadar
09	18	Jordan Para, Kuhalong	Jordan Para	Kuhalong	Bandarban Sadar
09	19	Jordan Para, Kuhalong	Jordan Para	Kuhalong	Bandarban Sadar
09	20	Jordan Para, Kuhalong	Jordan Para	Kuhalong	Bandarban Sadar
09	21	Jordan Para, Kuhalong	Jordan Para	Kuhalong	Bandarban Sadar
09	22	Jordan Para, Kuhalong	Jordan Para	Kuhalong	Bandarban Sadar
Date: 06/09/2015 Bawm Group, Hebron Para, Bandarban Sadar
Vill	ID	Village name
10	01	Hebron Para, Bandarban Sadar	Hebron Para	Bandarban	Bandarban Sadar	29
10	02	Hebron Para, Bandarban Sadar	Hebron Para	Bandarban	Bandarban Sadar
10	03	Hebron Para, Bandarban Sadar	Hebron Para	Bandarban	Bandarban Sadar
10	04	Hebron Para, Bandarban Sadar	Hebron Para	Bandarban	Bandarban Sadar
10	05	Hebron Para, Bandarban Sadar	Hebron Para	Bandarban	Bandarban Sadar
10	06	Hebron Para, Bandarban Sadar	Hebron Para	Bandarban	Bandarban Sadar
10	07	Hebron Para, Bandarban Sadar	Hebron Para	Bandarban	Bandarban Sadar
10	08	Hebron Para, Bandarban Sadar	Hebron Para	Bandarban	Bandarban Sadar
10	09	Hebron Para, Bandarban Sadar	Hebron Para	Bandarban	Bandarban Sadar
10	10	Hebron Para, Bandarban Sadar	Hebron Para	Bandarban	Bandarban Sadar
10	11	Hebron Para, Bandarban Sadar	Hebron Para	Bandarban	Bandarban Sadar
10	12	Hebron Para, Bandarban Sadar	Hebron Para	Bandarban	Bandarban Sadar
10	13	Hebron Para, Bandarban Sadar	Hebron Para	Bandarban	Bandarban Sadar
10	14	Hebron Para, Bandarban Sadar	Hebron Para	Bandarban	Bandarban Sadar
10	15	Hebron Para, Bandarban Sadar	Hebron Para	Bandarban	Bandarban Sadar
10	16	Hebron Para, Bandarban Sadar	Hebron Para	Bandarban	Bandarban Sadar
10	17	Hebron Para, Bandarban Sadar	Hebron Para	Bandarban	Bandarban Sadar
10	18	Hebron Para, Bandarban Sadar	Hebron Para	Bandarban	Bandarban Sadar
10	19	Hebron Para, Bandarban Sadar	Hebron Para	Bandarban	Bandarban Sadar
10	20	Hebron Para, Bandarban Sadar	Hebron Para	Bandarban	Bandarban Sadar
10	21	Hebron Para, Bandarban Sadar	Hebron Para	Bandarban	Bandarban Sadar
10	22	Hebron Para, Bandarban Sadar	Hebron Para	Bandarban	Bandarban Sadar
10	23	Hebron Para, Bandarban Sadar	Hebron Para	Bandarban	Bandarban Sadar
10	24	Hebron Para, Bandarban Sadar	Hebron Para	Bandarban	Bandarban Sadar
10	25	Hebron Para, Bandarban Sadar	Hebron Para	Bandarban	Bandarban Sadar
10	26	Hebron Para, Bandarban Sadar	Hebron Para	Bandarban	Bandarban Sadar
10	27	Hebron Para, Bandarban Sadar	Hebron Para	Bandarban	Bandarban Sadar
10	28	Hebron Para, Bandarban Sadar	Hebron Para	Bandarban	Bandarban Sadar
Date: 07/09/2015 Chakma Group, Prue Mong U Headman Para, Kuhalong
Vill	ID	Village name
11	01	Pru Mong U Headman Para, Klong	Pru Mong U Headman	Kuhalong	Bandarban Sadar	51
11	02	Pru Mong U Headman Para, Klong	Pru Mong U Headman	Kuhalong	Bandarban Sadar
11	03	Pru Mong U Headman Para, Klong	Pru Mong U Headman	Kuhalong	Bandarban Sadar
11	04	Pru Mong U Headman Para, Klong	Pru Mong U Headman	Kuhalong	Bandarban Sadar
11	05	Pru Mong U Headman Para, Klong	Pru Mong U Headman	Kuhalong	Bandarban Sadar
11	06	Pru Mong U Headman Para, Klong	Pru Mong U Headman	Kuhalong	Bandarban Sadar
11	07	Pru Mong U Headman Para, Klong	Pru Mong U Headman	Kuhalong	Bandarban Sadar
11	08	Pru Mong U Headman Para, Klong	Pru Mong U Headman	Kuhalong	Bandarban Sadar
11	09	Pru Mong U Headman Para, Klong	Pru Mong U Headman	Kuhalong	Bandarban Sadar
11	10	Pru Mong U Headman Para, Klong	Pru Mong U Headman	Kuhalong	Bandarban Sadar
11	11	Pru Mong U Headman Para, Klong	Pru Mong U Headman	Kuhalong	Bandarban Sadar
11	12	Pru Mong U Headman Para, Klong	Pru Mong U Headman	Kuhalong	Bandarban Sadar
11	13	Pru Mong U Headman Para, Klong	Pru Mong U Headman	Kuhalong	Bandarban Sadar
11	14	Pru Mong U Headman Para, Klong	Pru Mong U Headman	Kuhalong	Bandarban Sadar
11	15	Pru Mong U Headman Para, Klong	Pru Mong U Headman	Kuhalong	Bandarban Sadar
11	16	Pru Mong U Headman Para, Klong	Pru Mong U Headman	Kuhalong	Bandarban Sadar
11	17	Pru Mong U Headman Para, Klong	Pru Mong U Headman	Kuhalong	Bandarban Sadar
11	18	Pru Mong U Headman Para, Klong	Pru Mong U Headman	Kuhalong	Bandarban Sadar
11	19	Pru Mong U Headman Para, Klong	Pru Mong U Headman	Kuhalong	Bandarban Sadar
11	20	Pru Mong U Headman Para, Klong	Pru Mong U Headman	Kuhalong	Bandarban Sadar
11	21	Pru Mong U Headman Para, Klong	Pru Mong U Headman	Kuhalong	Bandarban Sadar
11	22	Pru Mong U Headman Para, Klong	Pru Mong U Headman	Kuhalong	Bandarban Sadar
11	23	Pru Mong U Headman Para, Klong	Pru Mong U Headman	Kuhalong	Bandarban Sadar
11	24	Pru Mong U Headman Para, Klong	Pru Mong U Headman	Kuhalong	Bandarban Sadar
11	25	Pru Mong U Headman Para, Klong	Pru Mong U Headman	Kuhalong	Bandarban Sadar
Date: 08/09/2015 Taungchangya Group, Chikka Para, Rajbila
Vill	ID	Village name
12	01	Chikka Para, Rajbila	Chikka Para	Rajbila	Bandarban Sadar	35
12	02	Chikka Para, Rajbila	Chikka Para	Rajbila	Bandarban Sadar
12	03	Chikka Para, Rajbila	Chikka Para	Rajbila	Bandarban Sadar
12	04	Chikka Para, Rajbila	Chikka Para	Rajbila	Bandarban Sadar
12	05	Chikka Para, Rajbila	Chikka Para	Rajbila	Bandarban Sadar
12	06	Chikka Para, Rajbila	Chikka Para	Rajbila	Bandarban Sadar
12	07	Chikka Para, Rajbila	Chikka Para	Rajbila	Bandarban Sadar
12	08	Chikka Para, Rajbila	Chikka Para	Rajbila	Bandarban Sadar
12	09	Chikka Para, Rajbila	Chikka Para	Rajbila	Bandarban Sadar
12	10	Chikka Para, Rajbila	Chikka Para	Rajbila	Bandarban Sadar
12	11	Chikka Para, Rajbila	Chikka Para	Rajbila	Bandarban Sadar
12	12	Chikka Para, Rajbila	Chikka Para	Rajbila	Bandarban Sadar
12	13	Chikka Para, Rajbila	Chikka Para	Rajbila	Bandarban Sadar
12	14	Chikka Para, Rajbila	Chikka Para	Rajbila	Bandarban Sadar
12	15	Chikka Para, Rajbila	Chikka Para	Rajbila	Bandarban Sadar
12	16	Chikka Para, Rajbila	Chikka Para	Rajbila	Bandarban Sadar
12	17	Chikka Para, Rajbila	Chikka Para	Rajbila	Bandarban Sadar
12	18	Chikka Para, Rajbila	Chikka Para	Rajbila	Bandarban Sadar
12	19	Chikka Para, Rajbila	Chikka Para	Rajbila	Bandarban Sadar
12	20	Chikka Para, Rajbila	Chikka Para	Rajbila	Bandarban Sadar
12	21	Chikka Para, Rajbila	Chikka Para	Rajbila	Bandarban Sadar
12	22	Chikka Para, Rajbila	Chikka Para	Rajbila	Bandarban Sadar
12	23	Chikka Para, Rajbila	Chikka Para	Rajbila	Bandarban Sadar
12	24	Chikka Para, Rajbila	Chikka Para	Rajbila	Bandarban Sadar
12	25	Chikka Para, Rajbila	Chikka Para	Rajbila	Bandarban Sadar
Date : 12/09/2015 Taungchangya Group, Rajbila Chakma Para, Rajbila
Vill	ID	Village name
13	01	Rajbila Chakma Para, Rajbila	Rajbila Chakma Para	Rajbila	Bandarban Sadar	60
13	02	Rajbila Chakma Para, Rajbila	Rajbila Chakma Para	Rajbila	Bandarban Sadar
13	03	Rajbila Chakma Para, Rajbila	Rajbila Chakma Para	Rajbila	Bandarban Sadar
13	04	Rajbila Chakma Para, Rajbila	Rajbila Chakma Para	Rajbila	Bandarban Sadar
13	05	Rajbila Chakma Para, Rajbila	Rajbila Chakma Para	Rajbila	Bandarban Sadar
13	06	Rajbila Chakma Para, Rajbila	Rajbila Chakma Para	Rajbila	Bandarban Sadar
13	07	Rajbila Chakma Para, Rajbila	Rajbila Chakma Para	Rajbila	Bandarban Sadar
13	08	Rajbila Chakma Para, Rajbila	Rajbila Chakma Para	Rajbila	Bandarban Sadar
13	09	Rajbila Chakma Para, Rajbila	Rajbila Chakma Para	Rajbila	Bandarban Sadar
13	10	Rajbila Chakma Para, Rajbila	Rajbila Chakma Para	Rajbila	Bandarban Sadar
13	11	Rajbila Chakma Para, Rajbila	Rajbila Chakma Para	Rajbila	Bandarban Sadar
13	12	Rajbila Chakma Para, Rajbila	Rajbila Chakma Para	Rajbila	Bandarban Sadar
13	13	Rajbila Chakma Para, Rajbila	Rajbila Chakma Para	Rajbila	Bandarban Sadar
13	14	Rajbila Chakma Para, Rajbila	Rajbila Chakma Para	Rajbila	Bandarban Sadar
13	15	Rajbila Chakma Para, Rajbila	Rajbila Chakma Para	Rajbila	Bandarban Sadar
13	16	Rajbila Chakma Para, Rajbila	Rajbila Chakma Para	Rajbila	Bandarban Sadar
13	17	Rajbila Chakma Para, Rajbila	Rajbila Chakma Para	Rajbila	Bandarban Sadar
13	18	Rajbila Chakma Para, Rajbila	Rajbila Chakma Para	Rajbila	Bandarban Sadar
13	19	Rajbila Chakma Para, Rajbila	Rajbila Chakma Para	Rajbila	Bandarban Sadar
13	20	Rajbila Chakma Para, Rajbila	Rajbila Chakma Para	Rajbila	Bandarban Sadar
13	21	Rajbila Chakma Para, Rajbila	Rajbila Chakma Para	Rajbila	Bandarban Sadar
13	22	Rajbila Chakma Para, Rajbila	Rajbila Chakma Para	Rajbila	Bandarban Sadar
13	23	Rajbila Chakma Para, Rajbila	Rajbila Chakma Para	Rajbila	Bandarban Sadar
13	24	Rajbila Chakma Para, Rajbila	Rajbila Chakma Para	Rajbila	Bandarban Sadar
13	25	Rajbila Chakma Para, Rajbila	Rajbila Chakma Para	Rajbila	Bandarban Sadar
13	26	Rajbila Chakma Para, Rajbila	Rajbila Chakma Para	Rajbila	Bandarban Sadar
13	27	Rajbila Chakma Para, Rajbila	Rajbila Chakma Para	Rajbila	Bandarban Sadar
13	28	Rajbila Chakma Para, Rajbila	Rajbila Chakma Para	Rajbila	Bandarban Sadar
13	29	Rajbila Chakma Para, Rajbila	Rajbila Chakma Para	Rajbila	Bandarban Sadar
13	30	Rajbila Chakma Para, Rajbila	Rajbila Chakma Para	Rajbila	Bandarban Sadar
Date: 13/09/2015 Bawm Group, Laime Para, Bandarban Sadar
Vill	ID	Village name
14	01	Laime Para, Bandarban Sadar	Laime Para	Bandarban Sadar	Bandarban Sadar	69
14	02	Laime Para, Bandarban Sadar	Laime Para	Bandarban Sadar	Bandarban Sadar
14	03	Laime Para, Bandarban Sadar	Laime Para	Bandarban Sadar	Bandarban Sadar
14	04	Laime Para, Bandarban Sadar	Laime Para	Bandarban Sadar	Bandarban Sadar
14	05	Laime Para, Bandarban Sadar	Laime Para	Bandarban Sadar	Bandarban Sadar
14	06	Laime Para, Bandarban Sadar	Laime Para	Bandarban Sadar	Bandarban Sadar
14	07	Laime Para, Bandarban Sadar	Laime Para	Bandarban Sadar	Bandarban Sadar
14	08	Laime Para, Bandarban Sadar	Laime Para	Bandarban Sadar	Bandarban Sadar
14	09	Laime Para, Bandarban Sadar	Laime Para	Bandarban Sadar	Bandarban Sadar
14	10	Laime Para, Bandarban Sadar	Laime Para	Bandarban Sadar	Bandarban Sadar
14	11	Laime Para, Bandarban Sadar	Laime Para	Bandarban Sadar	Bandarban Sadar
14	12	Laime Para, Bandarban Sadar	Laime Para	Bandarban Sadar	Bandarban Sadar
14	13	Laime Para, Bandarban Sadar	Laime Para	Bandarban Sadar	Bandarban Sadar
14	14	Laime Para, Bandarban Sadar	Laime Para	Bandarban Sadar	Bandarban Sadar
14	15	Laime Para, Bandarban Sadar	Laime Para	Bandarban Sadar	Bandarban Sadar
14	16	Laime Para, Bandarban Sadar	Laime Para	Bandarban Sadar	Bandarban Sadar
14	17	Laime Para, Bandarban Sadar	Laime Para	Bandarban Sadar	Bandarban Sadar
14	18	Laime Para, Bandarban Sadar	Laime Para	Bandarban Sadar	Bandarban Sadar
14	19	Laime Para, Bandarban Sadar	Laime Para	Bandarban Sadar	Bandarban Sadar
14	20	Laime Para, Bandarban Sadar	Laime Para	Bandarban Sadar	Bandarban Sadar
14	21	Laime Para, Bandarban Sadar	Laime Para	Bandarban Sadar	Bandarban Sadar
14	22	Laime Para, Bandarban Sadar	Laime Para	Bandarban Sadar	Bandarban Sadar
14	23	Laime Para, Bandarban Sadar	Laime Para	Bandarban Sadar	Bandarban Sadar
14	24	Laime Para, Bandarban Sadar	Laime Para	Bandarban Sadar	Bandarban Sadar
14	25	Laime Para, Bandarban Sadar	Laime Para	Bandarban Sadar	Bandarban Sadar
14	26	Laime Para, Bandarban Sadar	Laime Para	Bandarban Sadar	Bandarban Sadar
14	27	Laime Para, Bandarban Sadar	Laime Para	Bandarban Sadar	Bandarban Sadar
14	28	Laime Para, Bandarban Sadar	Laime Para	Bandarban Sadar	Bandarban Sadar
14	29	Laime Para, Bandarban Sadar	Laime Para	Bandarban Sadar	Bandarban Sadar
14	30	Laime Para, Bandarban Sadar	Laime Para	Bandarban Sadar	Bandarban Sadar
14	31	Laime Para, Bandarban Sadar	Laime Para	Bandarban Sadar	Bandarban Sadar
14	32	Laime Para, Bandarban Sadar	Laime Para	Bandarban Sadar	Bandarban Sadar
Date: 14/09/2015 Bawm Group, Faruk Para, Bandarban Sadar
Vill	ID	Village name
15	01	Faruk Para, Bandarban Sadar	Faruk Para	Showalok union	Bandarban Sadar	108
15	02	Faruk Para, Bandarban Sadar	Faruk Para	Showalok union	Bandarban Sadar
15	03	Faruk Para, Bandarban Sadar	Faruk Para	Showalok union	Bandarban Sadar
15	04	Faruk Para, Bandarban Sadar	Faruk Para	Showalok union	Bandarban Sadar
15	05	Faruk Para, Bandarban Sadar	Faruk Para	Showalok union	Bandarban Sadar
15	06	Faruk Para, Bandarban Sadar	Faruk Para	Showalok union	Bandarban Sadar
15	07	Faruk Para, Bandarban Sadar	Faruk Para	Showalok union	Bandarban Sadar
15	08	Faruk Para, Bandarban Sadar	Faruk Para	Showalok union	Bandarban Sadar
15	09	Faruk Para, Bandarban Sadar	Faruk Para	Showalok union	Bandarban Sadar
15	10	Faruk Para, Bandarban Sadar	Faruk Para	Showalok union	Bandarban Sadar
15	11	Faruk Para, Bandarban Sadar	Faruk Para	Showalok union	Bandarban Sadar
15	12	Faruk Para, Bandarban Sadar	Faruk Para	Showalok union	Bandarban Sadar
15	13	Faruk Para, Bandarban Sadar	Faruk Para	Showalok union	Bandarban Sadar
15	14	Faruk Para, Bandarban Sadar	Faruk Para	Showalok union	Bandarban Sadar
15	15	Faruk Para, Bandarban Sadar	Faruk Para	Showalok union	Bandarban Sadar
15	16	Faruk Para, Bandarban Sadar	Faruk Para	Showalok union	Bandarban Sadar
15	17	Faruk Para, Bandarban Sadar	Faruk Para	Showalok union	Bandarban Sadar
15	18	Faruk Para, Bandarban Sadar	Faruk Para	Showalok union	Bandarban Sadar
15	19	Faruk Para, Bandarban Sadar	Faruk Para	Showalok union	Bandarban Sadar
15	20	Faruk Para, Bandarban Sadar	Faruk Para	Showalok union	Bandarban Sadar
15	21	Faruk Para, Bandarban Sadar	Faruk Para	Showalok union	Bandarban Sadar
15	22	Faruk Para, Bandarban Sadar	Faruk Para	Showalok union	Bandarban Sadar
15	23	Faruk Para, Bandarban Sadar	Faruk Para	Showalok union	Bandarban Sadar
15	24	Faruk Para, Bandarban Sadar	Faruk Para	Showalok union	Bandarban Sadar
15	25	Faruk Para, Bandarban Sadar	Faruk Para	Showalok union	Bandarban Sadar
15	26	Faruk Para, Bandarban Sadar	Faruk Para	Showalok union	Bandarban Sadar
15	27	Faruk Para, Bandarban Sadar	Faruk Para	Showalok union	Bandarban Sadar
15	28	Faruk Para, Bandarban Sadar	Faruk Para	Showalok union	Bandarban Sadar
15	29	Faruk Para, Bandarban Sadar	Faruk Para	Showalok union	Bandarban Sadar
15	30	Faruk Para, Bandarban Sadar	Faruk Para	Showalok union	Bandarban Sadar
15	31	Faruk Para, Bandarban Sadar	Faruk Para	Showalok union	Bandarban Sadar
15	32	Faruk Para, Bandarban Sadar	Faruk Para	Showalok union	Bandarban Sadar
15	33	Faruk Para, Bandarban Sadar	Faruk Para	Showalok union	Bandarban Sadar
15	34	Faruk Para, Bandarban Sadar	Faruk Para	Showalok union	Bandarban Sadar
15	35	Faruk Para, Bandarban Sadar	Faruk Para	Showalok union	Bandarban Sadar
15	36	Faruk Para, Bandarban Sadar	Faruk Para	Showalok union	Bandarban Sadar
15	37	Faruk Para, Bandarban Sadar	Faruk Para	Showalok union	Bandarban Sadar
15	38	Faruk Para, Bandarban Sadar	Faruk Para	Showalok union	Bandarban Sadar
15	39	Faruk Para, Bandarban Sadar	Faruk Para	Showalok union	Bandarban Sadar
15	40	Faruk Para, Bandarban Sadar	Faruk Para	Showalok union	Bandarban Sadar
Date: 14/09/2015 Lushai Group, Faruk Para, Bandarban Sadar
Vill	ID	Village name
15	41	Faruk Para, Bandarban Sadar	Faruk Para	Showalok union	Bandarban Sadar	108
15	42	Faruk Para, Bandarban Sadar	Faruk Para	Showalok union	Bandarban Sadar
Date: 15/09/2015 Marma Group, Janchari Para, Rajbila
Vill	ID	Village name
16	01	Janchari Para, Rajbila	Janchari Para	Rajbila	Bandarban Sadar	127
16	02	Janchari Para, Rajbila	Janchari Para	Rajbila	Bandarban Sadar
16	03	Janchari Para, Rajbila	Janchari Para	Rajbila	Bandarban Sadar
16	04	Janchari Para, Rajbila	Janchari Para	Rajbila	Bandarban Sadar
16	05	Janchari Para, Rajbila	Janchari Para	Rajbila	Bandarban Sadar
16	06	Janchari Para, Rajbila	Janchari Para	Rajbila	Bandarban Sadar
16	07	Janchari Para, Rajbila	Janchari Para	Rajbila	Bandarban Sadar
16	08	Janchari Para, Rajbila	Janchari Para	Rajbila	Bandarban Sadar
16	09	Janchari Para, Rajbila	Janchari Para	Rajbila	Bandarban Sadar
16	10	Janchari Para, Rajbila	Janchari Para	Rajbila	Bandarban Sadar
16	11	Janchari Para, Rajbila	Janchari Para	Rajbila	Bandarban Sadar
16	12	Janchari Para, Rajbila	Janchari Para	Rajbila	Bandarban Sadar
16	13	Janchari Para, Rajbila	Janchari Para	Rajbila	Bandarban Sadar
16	14	Janchari Para, Rajbila	Janchari Para	Rajbila	Bandarban Sadar
16	15	Janchari Para, Rajbila	Janchari Para	Rajbila	Bandarban Sadar
16	16	Janchari Para, Rajbila	Janchari Para	Rajbila	Bandarban Sadar
16	17	Janchari Para, Rajbila	Janchari Para	Rajbila	Bandarban Sadar
16	18	Janchari Para, Rajbila	Janchari Para	Rajbila	Bandarban Sadar
16	19	Janchari Para, Rajbila	Janchari Para	Rajbila	Bandarban Sadar
16	20	Janchari Para, Rajbila	Janchari Para	Rajbila	Bandarban Sadar
16	21	Janchari Para, Rajbila	Janchari Para	Rajbila	Bandarban Sadar
16	22	Janchari Para, Rajbila	Janchari Para	Rajbila	Bandarban Sadar
16	23	Janchari Para, Rajbila	Janchari Para	Rajbila	Bandarban Sadar
16	24	Janchari Para, Rajbila	Janchari Para	Rajbila	Bandarban Sadar
16	25	Janchari Para, Rajbila	Janchari Para	Rajbila	Bandarban Sadar
16	26	Janchari Para, Rajbila	Janchari Para	Rajbila	Bandarban Sadar
16	27	Janchari Para, Rajbila	Janchari Para	Rajbila	Bandarban Sadar
16	28	Janchari Para, Rajbila	Janchari Para	Rajbila	Bandarban Sadar
16	29	Janchari Para, Rajbila	Janchari Para	Rajbila	Bandarban Sadar
16	30	Janchari Para, Rajbila	Janchari Para	Rajbila	Bandarban Sadar
16	31	Janchari Para, Rajbila	Janchari Para	Rajbila	Bandarban Sadar
Date: 05/10/2015 Tripura Group, Hati Bhanga Para, Bandarban Sadar
Vill	ID	Village name
17	01	Hati Bhanga Para, Bban Sadar	Hati Bhanga Para	Bandarban	Bandarban Sadar	34
17	02	Hati Bhanga Para, Bban Sadar	Hati Bhanga Para	Bandarban	Bandarban Sadar
17	03	Hati Bhanga Para, Bban Sadar	Hati Bhanga Para	Bandarban	Bandarban Sadar
17	04	Hati Bhanga Para, Bban Sadar	Hati Bhanga Para	Bandarban	Bandarban Sadar
17	05	Hati Bhanga Para, Bban Sadar	Hati Bhanga Para	Bandarban	Bandarban Sadar
17	06	Hati Bhanga Para, Bban Sadar	Hati Bhanga Para	Bandarban	Bandarban Sadar
17	07	Hati Bhanga Para, Bban Sadar	Hati Bhanga Para	Bandarban	Bandarban Sadar
17	08	Hati Bhanga Para, Bban Sadar	Hati Bhanga Para	Bandarban	Bandarban Sadar
17	09	Hati Bhanga Para, Bban Sadar	Hati Bhanga Para	Bandarban	Bandarban Sadar
17	10	Hati Bhanga Para, Bban Sadar	Hati Bhanga Para	Bandarban	Bandarban Sadar
17	11	Hati Bhanga Para, Bban Sadar	Hati Bhanga Para	Bandarban	Bandarban Sadar
17	12	Hati Bhanga Para, Bban Sadar	Hati Bhanga Para	Bandarban	Bandarban Sadar
17	13	Hati Bhanga Para, Bban Sadar	Hati Bhanga Para	Bandarban	Bandarban Sadar
17	14	Hati Bhanga Para, Bban Sadar	Hati Bhanga Para	Bandarban	Bandarban Sadar
17	15	Hati Bhanga Para, Bban Sadar	Hati Bhanga Para	Bandarban	Bandarban Sadar
17	16	Hati Bhanga Para, Bban Sadar	Hati Bhanga Para	Bandarban	Bandarban Sadar
17	17	Hati Bhanga Para, Bban Sadar	Hati Bhanga Para	Bandarban	Bandarban Sadar
17	18	Hati Bhanga Para, Bban Sadar	Hati Bhanga Para	Bandarban	Bandarban Sadar
17	19	Hati Bhanga Para, Bban Sadar	Hati Bhanga Para	Bandarban	Bandarban Sadar
17	20	Hati Bhanga Para, Bban Sadar	Hati Bhanga Para	Bandarban	Bandarban Sadar
17	21	Hati Bhanga Para, Bban Sadar	Hati Bhanga Para	Bandarban	Bandarban Sadar
17	22	Hati Bhanga Para, Bban Sadar	Hati Bhanga Para	Bandarban	Bandarban Sadar
17	23	Hati Bhanga Para, Bban Sadar	Hati Bhanga Para	Bandarban	Bandarban Sadar
17	24	Hati Bhanga Para, Bban Sadar	Hati Bhanga Para	Bandarban	Bandarban Sadar
17	25	Hati Bhanga Para, Bban Sadar	Hati Bhanga Para	Bandarban	Bandarban Sadar
17	26	Hati Bhanga Para, Bban Sadar	Hati Bhanga Para	Bandarban	Bandarban Sadar
17	27	Hati Bhanga Para, Bban Sadar	Hati Bhanga Para	Bandarban	Bandarban Sadar
17	28	Hati Bhanga Para, Bban Sadar	Hati Bhanga Para	Bandarban	Bandarban Sadar
Date: 06/10/2015 Marma Group, Kulikhong Headman Para, Kuhalong
Vill	ID	Village name
18	01	Kulikhong Headman Para, Kuhalong	Kulikhong Headman Para	Kuhalong	Bandarban Sadar	162
18	02	Kulikhong Headman Para, Klong	Kulikhong Headman Para	Kuhalong	Bandarban Sadar
18	03	Kulikhong Headman Para, Klong	Kulikhong Headman Para	Kuhalong	Bandarban Sadar
18	04	Kulikhong Headman Para, Klong	Kulikhong Headman Para	Kuhalong	Bandarban Sadar
18	05	Kulikhong Headman Para, Klong	Kulikhong Headman Para	Kuhalong	Bandarban Sadar
18	06	Kulikhong Headman Para, Klong	Kulikhong Headman Para	Kuhalong	Bandarban Sadar
18	07	Kulikhong Headman Para, Klong	Kulikhong Headman Para	Kuhalong	Bandarban Sadar
18	08	Kulikhong Headman Para, Klong	Kulikhong Headman Para	Kuhalong	Bandarban Sadar
18	09	Kulikhong Headman Para, Klong	Kulikhong Headman Para	Kuhalong	Bandarban Sadar
18	10	Kulikhong Headman Para, Klong	Kulikhong Headman Para	Kuhalong	Bandarban Sadar
18	11	Kulikhong Headman Para, Klong	Kulikhong Headman Para	Kuhalong	Bandarban Sadar
18	12	Kulikhong Headman Para, Klong	Kulikhong Headman Para	Kuhalong	Bandarban Sadar
18	13	Kulikhong Headman Para, Klong	Kulikhong Headman Para	Kuhalong	Bandarban Sadar
18	14	Kulikhong Headman Para, Klong	Kulikhong Headman Para	Kuhalong	Bandarban Sadar
18	15	Kulikhong Headman Para, Klong	Kulikhong Headman Para	Kuhalong	Bandarban Sadar
18	16	Kulikhong Headman Para, Klong	Kulikhong Headman Para	Kuhalong	Bandarban Sadar
18	17	Kulikhong Headman Para, Klong	Kulikhong Headman Para	Kuhalong	Bandarban Sadar
18	18	Kulikhong Headman Para, Klong	Kulikhong Headman Para	Kuhalong	Bandarban Sadar
18	19	Kulikhong Headman Para, Klong	Kulikhong Headman Para	Kuhalong	Bandarban Sadar
Date: 06/10/2015 Chakma Group, Kulikhong Headman Para, Kuhalong
Vill	ID	Village name
18	20	Kulikhong Headman Para, Klong	Pru Mong u headman para	Kuhalong	Bandarban Sadar	51
18	21	Kulikhong Headman Para, Klong	Pru Mong u headman para	Kuhalong	Bandarban Sadar
18	22	Kulikhong Headman Para, Klong	Pru Mong u headman para	Kuhalong	Bandarban Sadar
18	23	Kulikhong Headman Para, Klong	Pru Mong u headman para	Kuhalong	Bandarban Sadar
18	24	Kulikhong Headman Para, Klong	Pru Mong u headman para	Kuhalong	Bandarban Sadar
18	25	Kulikhong Headman Para, Klong	Pru Mong u headman para	Kuhalong	Bandarban Sadar
18	26	Kulikhong Headman Para, Klong	Pru Mong u headman para	Kuhalong	Bandarban Sadar
18	27	Kulikhong Headman Para, Klong	Pru Mong u headman para	Kuhalong	Bandarban Sadar
18	28	Kulikhong Headman Para, Klong	Pru Mong u headman para	Kuhalong	Bandarban Sadar
18	29	Kulikhong Headman Para, Klong	Pru Mong u headman para	Kuhalong	Bandarban Sadar
18	30	Kulikhong Headman Para, Klong	Pru Mong u headman para	Kuhalong	Bandarban Sadar
18	31	Kulikhong Headman Para, Klong	Pru Mong u headman para	Kuhalong	Bandarban Sadar
18	32	Kulikhong Headman Para, Klong	Pru Mong u headman para	Kuhalong	Bandarban Sadar
18	33	Kulikhong Headman Para, Klong	Pru Mong u headman para	Kuhalong	Bandarban Sadar
18	34	Kulikhong Headman Para, Klong	Pru Mong u headman para	Kuhalong	Bandarban Sadar
18	35	Kulikhong Headman Para, Klong	Pru Mong u headman para	Kuhalong	Bandarban Sadar
Date: 18/10/2015 Khyang Group, Gunguru Mukh Para, Kuhalong
Vill	ID	Village name
19	01	Gunguru Mukh Para, Kuhalong	Gunguru Mukh Para and Ghungru moddhom para and Ghungru upor para	Kuhalong	Bandarban Sadar	124
19	02	Gunguru Mukh Para, Kuhalong	Gunguru Mukh Para and Ghungru moddhom para and Ghungru upor para	Kuhalong	Bandarban Sadar
19	03	Gunguru Mukh Para, Kuhalong	Gunguru Mukh Para and Ghungru moddhom para and Ghungru upor para	Kuhalong	Bandarban Sadar
19	04	Gunguru Mukh Para, Kuhalong	Gunguru Mukh Para and Ghungru moddhom para and Ghungru upor para	Kuhalong	Bandarban Sadar
19	05	Gunguru Mukh Para, Kuhalong	Gunguru Mukh Para and Ghungru moddhom para and Ghungru upor para	Kuhalong	Bandarban Sadar
19	06	Gunguru Mukh Para, Kuhalong	Gunguru Mukh Para and Ghungru moddhom para and Ghungru upor para	Kuhalong	Bandarban Sadar
19	07	Gunguru Mukh Para, Kuhalong	Gunguru Mukh Para and Ghungru moddhom para and Ghungru upor para	Kuhalong	Bandarban Sadar
19	08	Gunguru Mukh Para, Kuhalong	Gunguru Mukh Para and Ghungru moddhom para and Ghungru upor para	Kuhalong	Bandarban Sadar
19	09	Gunguru Mukh Para, Kuhalong	Gunguru Mukh Para and Ghungru moddhom para and Ghungru upor para	Kuhalong	Bandarban Sadar
19	10	Gunguru Mukh Para, Kuhalong	Gunguru Mukh Para and Ghungru moddhom para and Ghungru upor para	Kuhalong	Bandarban Sadar
19	11	Gunguru Mukh Para, Kuhalong	Gunguru Mukh Para and Ghungru moddhom para and Ghungru upor para	Kuhalong	Bandarban Sadar
19	12	Gunguru Mukh Para, Kuhalong	Gunguru Mukh Para and Ghungru moddhom para and Ghungru upor para	Kuhalong	Bandarban Sadar
19	13	Gunguru Mukh Para, Kuhalong	Gunguru Mukh Para and Ghungru moddhom para and Ghungru upor para	Kuhalong	Bandarban Sadar
19	14	Gunguru Mukh Para, Kuhalong	Gunguru Mukh Para and Ghungru moddhom para and Ghungru upor para	Kuhalong	Bandarban Sadar
19	15	Gunguru Mukh Para, Kuhalong	Gunguru Mukh Para and Ghungru moddhom para and Ghungru upor para	Kuhalong	Bandarban Sadar
19	16	Gunguru Mukh Para, Kuhalong	Gunguru Mukh Para and Ghungru moddhom para and Ghungru upor para	Kuhalong	Bandarban Sadar
19	17	Gunguru Mukh Para, Kuhalong	Gunguru Mukh Para and Ghungru moddhom para and Ghungru upor para	Kuhalong	Bandarban Sadar
19	18	Gunguru Mukh Para, Kuhalong	Gunguru Mukh Para and Ghungru moddhom para and Ghungru upor para	Kuhalong	Bandarban Sadar
19	19	Gunguru Mukh Para, Kuhalong	Gunguru Mukh Para and Ghungru moddhom para and Ghungru upor para	Kuhalong	Bandarban Sadar
19	20	Gunguru Mukh Para, Kuhalong	Gunguru Mukh Para and Ghungru moddhom para and Ghungru upor para	Kuhalong	Bandarban Sadar
19	21	Gunguru Mukh Para, Kuhalong	Gunguru Mukh Para and Ghungru moddhom para and Ghungru upor para	Kuhalong	Bandarban Sadar
19	22	Gunguru Mukh Para, Kuhalong	Gunguru Mukh Para and Ghungru moddhom para and Ghungru upor para	Kuhalong	Bandarban Sadar
19	23	Gunguru Mukh Para, Kuhalong	Gunguru Mukh Para and Ghungru moddhom para and Ghungru upor para	Kuhalong	Bandarban Sadar
19	24	Gunguru Mukh Para, Kuhalong	Gunguru Mukh Para and Ghungru moddhom para and Ghungru upor para	Kuhalong	Bandarban Sadar
19	25	Gunguru Mukh Para, Kuhalong	Gunguru Mukh Para and Ghungru moddhom para and Ghungru upor para	Kuhalong	Bandarban Sadar
19	26	Gunguru Mukh Para, Kuhalong	Gunguru Mukh Para and Ghungru moddhom para and Ghungru upor para	Kuhalong	Bandarban Sadar
19	27	Gunguru Mukh Para, Kuhalong	Gunguru Mukh Para and Ghungru moddhom para and Ghungru upor para	Kuhalong	Bandarban Sadar
19	28	Gunguru Mukh Para, Kuhalong	Gunguru Mukh Para and Ghungru moddhom para and Ghungru upor para	Kuhalong	Bandarban Sadar
19	29	Gunguru Mukh Para, Kuhalong	Gunguru Mukh Para and Ghungru moddhom para and Ghungru upor para	Kuhalong	Bandarban Sadar
19	30	Gunguru Mukh Para, Kuhalong	Gunguru Mukh Para and Ghungru moddhom para and Ghungru upor para	Kuhalong	Bandarban Sadar
19	31	Gunguru Mukh Para, Kuhalong	Gunguru Mukh Para and Ghungru moddhom para and Ghungru upor para	Kuhalong	Bandarban Sadar
19	32	Gunguru Mukh Para, Kuhalong	Gunguru Mukh Para and Ghungru moddhom para and Ghungru upor para	Kuhalong	Bandarban Sadar
19	33	Gunguru Mukh Para, Kuhalong	Gunguru Mukh Para and Ghungru moddhom para and Ghungru upor para	Kuhalong	Bandarban Sadar
19	34	Gunguru Mukh Para, Kuhalong	Gunguru Mukh Para and Ghungru moddhom para and Ghungru upor para	Kuhalong	Bandarban Sadar
19	35	Gunguru Mukh Para, Kuhalong	Gunguru Mukh Para and Ghungru moddhom para and Ghungru upor para	Kuhalong	Bandarban Sadar
19	36	Gunguru Mukh Para, Kuhalong	Gunguru Mukh Para and Ghungru moddhom para and Ghungru upor para	Kuhalong	Bandarban Sadar
19	37	Gunguru Mukh Para, Kuhalong	Gunguru Mukh Para and Ghungru moddhom para and Ghungru upor para	Kuhalong	Bandarban Sadar
19	38	Gunguru Mukh Para, Kuhalong	Gunguru Mukh Para and Ghungru moddhom para and Ghungru upor para	Kuhalong	Bandarban Sadar
19	39	Gunguru Mukh Para, Kuhalong	Gunguru Mukh Para and Ghungru moddhom para and Ghungru upor para	Kuhalong	Bandarban Sadar
19	40	Gunguru Mukh Para, Kuhalong	Gunguru Mukh Para and Ghungru moddhom para and Ghungru upor para	Kuhalong	Bandarban Sadar
19	41	Gunguru Mukh Para, Kuhalong	Gunguru Mukh Para and Ghungru moddhom para and Ghungru upor para	Kuhalong	Bandarban Sadar
19	42	Gunguru Mukh Para, Kuhalong	Gunguru Mukh Para and Ghungru moddhom para and Ghungru upor para	Kuhalong	Bandarban Sadar
19	43	Gunguru Mukh Para, Kuhalong	Gunguru Mukh Para and Ghungru moddhom para and Ghungru upor para	Kuhalong	Bandarban Sadar
19	44	Gunguru Mukh Para, Kuhalong	Gunguru Mukh Para and Ghungru moddhom para and Ghungru upor para	Kuhalong	Bandarban Sadar
19	45	Gunguru Mukh Para, Kuhalong	Gunguru Mukh Para and Ghungru moddhom para and Ghungru upor para	Kuhalong	Bandarban Sadar
19	46	Gunguru Mukh Para, Kuhalong	Gunguru Mukh Para and Ghungru moddhom para and Ghungru upor para	Kuhalong	Bandarban Sadar
19	47	Gunguru Mukh Para, Kuhalong	Gunguru Mukh Para and Ghungru moddhom para and Ghungru upor para	Kuhalong	Bandarban Sadar
19	48	Gunguru Mukh Para, Kuhalong	Gunguru Mukh Para and Ghungru moddhom para and Ghungru upor para	Kuhalong	Bandarban Sadar
19	49	Gunguru Mukh Para, Kuhalong	Gunguru Mukh Para and Ghungru moddhom para and Ghungru upor para	Kuhalong	Bandarban Sadar
19	50	Gunguru Mukh Para, Kuhalong	Gunguru Mukh Para and Ghungru moddhom para and Ghungru upor para	Kuhalong	Bandarban Sadar
Date: 19/10/2015 Khyang Group, Gunguru Mukh Para, Kuhalong
Vill	ID	Village name
20	01	Gunguru Mukh Para, Kuhalong	Gunguru Mukh Para and Ghungru moddhom para and Ghungru upor para	Kuhalong	Bandarban Sadar
20	02	Gunguru Mukh Para, Kuhalong	Gunguru Mukh Para and Ghungru moddhom para and Ghungru upor para	Kuhalong	Bandarban Sadar
20	03	Gunguru Mukh Para, Kuhalong	Gunguru Mukh Para and Ghungru moddhom para and Ghungru upor para	Kuhalong	Bandarban Sadar
20	04	Gunguru Mukh Para, Kuhalong	Gunguru Mukh Para and Ghungru moddhom para and Ghungru upor para	Kuhalong	Bandarban Sadar
20	05	Gunguru Mukh Para, Kuhalong	Gunguru Mukh Para and Ghungru moddhom para and Ghungru upor para	Kuhalong	Bandarban Sadar
20	06	Gunguru Mukh Para, Kuhalong	Gunguru Mukh Para and Ghungru moddhom para and Ghungru upor para	Kuhalong	Bandarban Sadar
20	07	Gunguru Mukh Para, Kuhalong	Gunguru Mukh Para and Ghungru moddhom para and Ghungru upor para	Kuhalong	Bandarban Sadar
20	08	Gunguru Mukh Para, Kuhalong	Gunguru Mukh Para and Ghungru moddhom para and Ghungru upor para	Kuhalong	Bandarban Sadar
20	09	Gunguru Mukh Para, Kuhalong	Gunguru Mukh Para and Ghungru moddhom para and Ghungru upor para	Kuhalong	Bandarban Sadar
20	10	Gunguru Mukh Para, Kuhalong	Gunguru Mukh Para and Ghungru moddhom para and Ghungru upor para	Kuhalong	Bandarban Sadar
20	11	Gunguru Mukh Para, Kuhalong	Gunguru Mukh Para and Ghungru moddhom para and Ghungru upor para	Kuhalong	Bandarban Sadar
20	12	Gunguru Mukh Para, Kuhalong	Gunguru Mukh Para and Ghungru moddhom para and Ghungru upor para	Kuhalong	Bandarban Sadar
20	13	Gunguru Mukh Para, Kuhalong	Gunguru Mukh Para and Ghungru moddhom para and Ghungru upor para	Kuhalong	Bandarban Sadar
20	14	Gunguru Mukh Para, Kuhalong	Gunguru Mukh Para and Ghungru moddhom para and Ghungru upor para	Kuhalong	Bandarban Sadar
20	15	Gunguru Mukh Para, Kuhalong	Gunguru Mukh Para and Ghungru moddhom para and Ghungru upor para	Kuhalong	Bandarban Sadar
20	16	Gunguru Mukh Para, Kuhalong	Gunguru Mukh Para and Ghungru moddhom para and Ghungru upor para	Kuhalong	Bandarban Sadar
20	17	Gunguru Mukh Para, Kuhalong	Gunguru Mukh Para and Ghungru moddhom para and Ghungru upor para	Kuhalong	Bandarban Sadar
20	18	Gunguru Mukh Para, Kuhalong	Gunguru Mukh Para and Ghungru moddhom para and Ghungru upor para	Kuhalong	Bandarban Sadar
20	19	Gunguru Mukh Para, Kuhalong	Gunguru Mukh Para and Ghungru moddhom para and Ghungru upor para	Kuhalong	Bandarban Sadar
20	20	Gunguru Mukh Para, Kuhalong	Gunguru Mukh Para and Ghungru moddhom para and Ghungru upor para	Kuhalong	Bandarban Sadar
20	21	Gunguru Mukh Para, Kuhalong	Gunguru Mukh Para and Ghungru moddhom para and Ghungru upor para	Kuhalong	Bandarban Sadar
20	22	Gunguru Mukh Para, Kuhalong	Gunguru Mukh Para and Ghungru moddhom para and Ghungru upor para	Kuhalong	Bandarban Sadar
20	23	Gunguru Mukh Para, Kuhalong	Gunguru Mukh Para and Ghungru moddhom para and Ghungru upor para	Kuhalong	Bandarban Sadar
20	24	Gunguru Mukh Para, Kuhalong	Gunguru Mukh Para and Ghungru moddhom para and Ghungru upor para	Kuhalong	Bandarban Sadar
20	25	Gunguru Mukh Para, Kuhalong	Gunguru Mukh Para and Ghungru moddhom para and Ghungru upor para	Kuhalong	Bandarban Sadar
20	26	Gunguru Mukh Para, Kuhalong	Gunguru Mukh Para and Ghungru moddhom para and Ghungru upor para	Kuhalong	Bandarban Sadar
20	27	Gunguru Mukh Para, Kuhalong	Gunguru Mukh Para and Ghungru moddhom para and Ghungru upor para	Kuhalong	Bandarban Sadar
20	28	Gunguru Mukh Para, Kuhalong	Gunguru Mukh Para and Ghungru moddhom para and Ghungru upor para	Kuhalong	Bandarban Sadar
20	29	Gunguru Mukh Para, Kuhalong	Gunguru Mukh Para and Ghungru moddhom para and Ghungru upor para	Kuhalong	Bandarban Sadar
20	30	Gunguru Mukh Para, Kuhalong	Gunguru Mukh Para and Ghungru moddhom para and Ghungru upor para	Kuhalong	Bandarban Sadar
20	31	Gunguru Mukh Para, Kuhalong	Gunguru Mukh Para and Ghungru moddhom para and Ghungru upor para	Kuhalong	Bandarban Sadar
20	32	Gunguru Mukh Para, Kuhalong	Gunguru Mukh Para and Ghungru moddhom para and Ghungru upor para	Kuhalong	Bandarban Sadar
20	33	Gunguru Mukh Para, Kuhalong	Gunguru Mukh Para and Ghungru moddhom para and Ghungru upor para	Kuhalong	Bandarban Sadar
20	34	Gunguru Mukh Para, Kuhalong	Gunguru Mukh Para and Ghungru moddhom para and Ghungru upor para	Kuhalong	Bandarban Sadar
20	35	Gunguru Mukh Para, Kuhalong	Gunguru Mukh Para and Ghungru moddhom para and Ghungru upor para	Kuhalong	Bandarban Sadar
20	36	Gunguru Mukh Para, Kuhalong	Gunguru Mukh Para and Ghungru moddhom para and Ghungru upor para	Kuhalong	Bandarban Sadar
20	37	Gunguru Mukh Para, Kuhalong	Gunguru Mukh Para and Ghungru moddhom para and Ghungru upor para	Kuhalong	Bandarban Sadar
20	38	Gunguru Mukh Para, Kuhalong	Gunguru Mukh Para and Ghungru moddhom para and Ghungru upor para	Kuhalong	Bandarban Sadar
20	39	Gunguru Mukh Para, Kuhalong	Gunguru Mukh Para and Ghungru moddhom para and Ghungru upor para	Kuhalong	Bandarban Sadar
20	40	Gunguru Mukh Para, Kuhalong	Gunguru Mukh Para and Ghungru moddhom para and Ghungru upor para	Kuhalong	Bandarban Sadar
20	41	Gunguru Mukh Para, Kuhalong	Gunguru Mukh Para and Ghungru moddhom para and Ghungru upor para	Kuhalong	Bandarban Sadar
20	42	Gunguru Mukh Para, Kuhalong	Gunguru Mukh Para and Ghungru moddhom para and Ghungru upor para	Kuhalong	Bandarban Sadar
20	43	Gunguru Mukh Para, Kuhalong	Gunguru Mukh Para and Ghungru moddhom para and Ghungru upor para	Kuhalong	Bandarban Sadar
20	44	Gunguru Mukh Para, Kuhalong	Gunguru Mukh Para and Ghungru moddhom para and Ghungru upor para	Kuhalong	Bandarban Sadar
20	45	Gunguru Mukh Para, Kuhalong	Gunguru Mukh Para and Ghungru moddhom para and Ghungru upor para	Kuhalong	Bandarban Sadar
20	46	Gunguru Mukh Para, Kuhalong	Gunguru Mukh Para and Ghungru moddhom para and Ghungru upor para	Kuhalong	Bandarban Sadar
20	47	Gunguru Mukh Para, Kuhalong	Gunguru Mukh Para and Ghungru moddhom para and Ghungru upor para	Kuhalong	Bandarban Sadar
20	48	Gunguru Mukh Para, Kuhalong	Gunguru Mukh Para and Ghungru moddhom para and Ghungru upor para	Kuhalong	Bandarban Sadar
20	49	Gunguru Mukh Para, Kuhalong	Gunguru Mukh Para and Ghungru moddhom para and Ghungru upor para	Kuhalong	Bandarban Sadar
20	50	Gunguru Mukh Para, Kuhalong	Gunguru Mukh Para and Ghungru moddhom para and Ghungru upor para	Kuhalong	Bandarban Sadar
Date: 25/10/2015 Bengali Group, Bhorakhali Para, Kuhalong
Vill	ID	Village name
21	01	Bhorakhali Para, Kuhalong	Bhorakhali Para	Kuhalong	Bandarban Sadar	60
21	02	Bhorakhali Para, Kuhalong	Bhorakhali Para	Kuhalong	Bandarban Sadar
21	03	Bhorakhali Para, Kuhalong	Bhorakhali Para	Kuhalong	Bandarban Sadar
21	04	Bhorakhali Para, Kuhalong	Bhorakhali Para	Kuhalong	Bandarban Sadar
21	05	Bhorakhali Para, Kuhalong	Bhorakhali Para	Kuhalong	Bandarban Sadar
21	06	Bhorakhali Para, Kuhalong	Bhorakhali Para	Kuhalong	Bandarban Sadar
21	07	Bhorakhali Para, Kuhalong	Bhorakhali Para	Kuhalong	Bandarban Sadar
21	08	Bhorakhali Para, Kuhalong	Bhorakhali Para	Kuhalong	Bandarban Sadar
21	09	Bhorakhali Para, Kuhalong	Bhorakhali Para	Kuhalong	Bandarban Sadar
21	10	Bhorakhali Para, Kuhalong	Bhorakhali Para	Kuhalong	Bandarban Sadar
21	11	Bhorakhali Para, Kuhalong	Bhorakhali Para	Kuhalong	Bandarban Sadar
21	12	Bhorakhali Para, Kuhalong	Bhorakhali Para	Kuhalong	Bandarban Sadar
21	13	Bhorakhali Para, Kuhalong	Bhorakhali Para	Kuhalong	Bandarban Sadar
21	14	Bhorakhali Para, Kuhalong	Bhorakhali Para	Kuhalong	Bandarban Sadar
21	15	Bhorakhali Para, Kuhalong	Bhorakhali Para	Kuhalong	Bandarban Sadar
21	16	Bhorakhali Para, Kuhalong	Bhorakhali Para	Kuhalong	Bandarban Sadar
21	17	Bhorakhali Para, Kuhalong	Bhorakhali Para	Kuhalong	Bandarban Sadar
21	18	Bhorakhali Para, Kuhalong	Bhorakhali Para	Kuhalong	Bandarban Sadar
21	19	Bhorakhali Para, Kuhalong	Bhorakhali Para	Kuhalong	Bandarban Sadar
21	20	Bhorakhali Para, Kuhalong	Bhorakhali Para	Kuhalong	Bandarban Sadar
21	21	Bhorakhali Para, Kuhalong	Bhorakhali Para	Kuhalong	Bandarban Sadar
21	22	Bhorakhali Para, Kuhalong	Bhorakhali Para	Kuhalong	Bandarban Sadar
21	23	Bhorakhali Para, Kuhalong	Bhorakhali Para	Kuhalong	Bandarban Sadar
21	24	Bhorakhali Para, Kuhalong	Bhorakhali Para	Kuhalong	Bandarban Sadar
21	25	Bhorakhali Para, Kuhalong	Bhorakhali Para	Kuhalong	Bandarban Sadar
21	26	Bhorakhali Para, Kuhalong	Bhorakhali Para	Kuhalong	Bandarban Sadar
21	27	Bhorakhali Para, Kuhalong	Bhorakhali Para	Kuhalong	Bandarban Sadar
21	28	Bhorakhali Para, Kuhalong	Bhorakhali Para	Kuhalong	Bandarban Sadar
21	29	Bhorakhali Para, Kuhalong	Bhorakhali Para	Kuhalong	Bandarban Sadar
21	30	Bhorakhali Para, Kuhalong	Bhorakhali Para	Kuhalong	Bandarban Sadar
21	31	Bhorakhali Para, Kuhalong	Bhorakhali Para	Kuhalong	Bandarban Sadar
21	32	Bhorakhali Para, Kuhalong	Bhorakhali Para	Kuhalong	Bandarban Sadar
21	33	Bhorakhali Para, Kuhalong	Bhorakhali Para	Kuhalong	Bandarban Sadar
21	34	Bhorakhali Para, Kuhalong	Bhorakhali Para	Kuhalong	Bandarban Sadar
21	35	Bhorakhali Para, Kuhalong	Bhorakhali Para	Kuhalong	Bandarban Sadar
21	36	Bhorakhali Para, Kuhalong	Bhorakhali Para	Kuhalong	Bandarban Sadar
21	37	Bhorakhali Para, Kuhalong	Bhorakhali Para	Kuhalong	Bandarban Sadar
21	38	Bhorakhali Para, Kuhalong	Bhorakhali Para	Kuhalong	Bandarban Sadar
21	39	Bhorakhali Para, Kuhalong	Bhorakhali Para	Kuhalong	Bandarban Sadar
21	40	Bhorakhali Para, Kuhalong	Bhorakhali Para	Kuhalong	Bandarban Sadar
21	41	Bhorakhali Para, Kuhalong	Bhorakhali Para	Kuhalong	Bandarban Sadar
21	42	Bhorakhali Para, Kuhalong	Bhorakhali Para	Kuhalong	Bandarban Sadar
21	43	Bhorakhali Para, Kuhalong	Bhorakhali Para	Kuhalong	Bandarban Sadar
21	44	Bhorakhali Para, Kuhalong	Bhorakhali Para	Kuhalong	Bandarban Sadar
21	45	Bhorakhali Para, Kuhalong	Bhorakhali Para	Kuhalong	Bandarban Sadar
21	46	Bhorakhali Para, Kuhalong	Bhorakhali Para	Kuhalong	Bandarban Sadar
21	47	Bhorakhali Para, Kuhalong	Bhorakhali Para	Kuhalong	Bandarban Sadar
21	48	Bhorakhali Para, Kuhalong	Bhorakhali Para	Kuhalong	Bandarban Sadar
21	49	Bhorakhali Para, Kuhalong	Bhorakhali Para	Kuhalong	Bandarban Sadar
21	50	Bhorakhali Para, Kuhalong	Bhorakhali Para	Kuhalong	Bandarban Sadar
21	51	Bhorakhali Para, Kuhalong	Bhorakhali Para	Kuhalong	Bandarban Sadar
21	52	Bhorakhali Para, Kuhalong	Bhorakhali Para	Kuhalong	Bandarban Sadar
21	53	Bhorakhali Para, Kuhalong	Bhorakhali Para	Kuhalong	Bandarban Sadar
21	54	Bhorakhali Para, Kuhalong	Bhorakhali Para	Kuhalong	Bandarban Sadar
Date: 26/10/2015 Bengali Group, Muslim Para, Kuhalong
Vill	ID	Village name
22	01	Muslim Para, Kuhalong	Bikrechara Muslim Para	Kuhalong	Bandarban Sadar	161
22	02	Muslim Para, Kuhalong	Bikrechara Muslim Para	Kuhalong	Bandarban Sadar
22	03	Muslim Para, Kuhalong	Bikrechara Muslim Para	Kuhalong	Bandarban Sadar
22	04	Muslim Para, Kuhalong	Bikrechara Muslim Para	Kuhalong	Bandarban Sadar
22	05	Muslim Para, Kuhalong	Bikrechara Muslim Para	Kuhalong	Bandarban Sadar
22	06	Muslim Para, Kuhalong	Bikrechara Muslim Para	Kuhalong	Bandarban Sadar
22	07	Muslim Para, Kuhalong	Bikrechara Muslim Para	Kuhalong	Bandarban Sadar
22	08	Muslim Para, Kuhalong	Bikrechara Muslim Para	Kuhalong	Bandarban Sadar
22	09	Muslim Para, Kuhalong	Bikrechara Muslim Para	Kuhalong	Bandarban Sadar
22	10	Muslim Para, Kuhalong	Bikrechara Muslim Para	Kuhalong	Bandarban Sadar
22	11	Muslim Para, Kuhalong	Bikrechara Muslim Para	Kuhalong	Bandarban Sadar
22	12	Muslim Para, Kuhalong	Bikrechara Muslim Para	Kuhalong	Bandarban Sadar
22	13	Muslim Para, Kuhalong	Bikrechara Muslim Para	Kuhalong	Bandarban Sadar
22	14	Muslim Para, Kuhalong	Bikrechara Muslim Para	Kuhalong	Bandarban Sadar
22	15	Muslim Para, Kuhalong	Bikrechara Muslim Para	Kuhalong	Bandarban Sadar
22	16	Muslim Para, Kuhalong	Bikrechara Muslim Para	Kuhalong	Bandarban Sadar
22	17	Muslim Para, Kuhalong	Bikrechara Muslim Para	Kuhalong	Bandarban Sadar
22	18	Muslim Para, Kuhalong	Bikrechara Muslim Para	Kuhalong	Bandarban Sadar
22	19	Muslim Para, Kuhalong	Bikrechara Muslim Para	Kuhalong	Bandarban Sadar
22	20	Muslim Para, Kuhalong	Bikrechara Muslim Para	Kuhalong	Bandarban Sadar
22	21	Muslim Para, Kuhalong	Bikrechara Muslim Para	Kuhalong	Bandarban Sadar
22	22	Muslim Para, Kuhalong	Bikrechara Muslim Para	Kuhalong	Bandarban Sadar
22	23	Muslim Para, Kuhalong	Bikrechara Muslim Para	Kuhalong	Bandarban Sadar
22	24	Muslim Para, Kuhalong	Bikrechara Muslim Para	Kuhalong	Bandarban Sadar
22	25	Muslim Para, Kuhalong	Bikrechara Muslim Para	Kuhalong	Bandarban Sadar
22	26	Muslim Para, Kuhalong	Bikrechara Muslim Para	Kuhalong	Bandarban Sadar
22	27	Muslim Para, Kuhalong	Bikrechara Muslim Para	Kuhalong	Bandarban Sadar
22	28	Muslim Para, Kuhalong	Bikrechara Muslim Para	Kuhalong	Bandarban Sadar
22	29	Muslim Para, Kuhalong	Bikrechara Muslim Para	Kuhalong	Bandarban Sadar
22	30	Muslim Para, Kuhalong	Bikrechara Muslim Para	Kuhalong	Bandarban Sadar
22	31	Muslim Para, Kuhalong	Bikrechara Muslim Para	Kuhalong	Bandarban Sadar
22	32	Muslim Para, Kuhalong	Bikrechara Muslim Para	Kuhalong	Bandarban Sadar
22	33	Muslim Para, Kuhalong	Bikrechara Muslim Para	Kuhalong	Bandarban Sadar
22	34	Muslim Para, Kuhalong	Bikrechara Muslim Para	Kuhalong	Bandarban Sadar
22	35	Muslim Para, Kuhalong	Bikrechara Muslim Para	Kuhalong	Bandarban Sadar
22	36	Muslim Para, Kuhalong	Bikrechara Muslim Para	Kuhalong	Bandarban Sadar
22	37	Muslim Para, Kuhalong	Bikrechara Muslim Para	Kuhalong	Bandarban Sadar
22	38	Muslim Para, Kuhalong	Bikrechara Muslim Para	Kuhalong	Bandarban Sadar
22	39	Muslim Para, Kuhalong	Bikrechara Muslim Para	Kuhalong	Bandarban Sadar
22	40	Muslim Para, Kuhalong	Bikrechara Muslim Para	Kuhalong	Bandarban Sadar
22	41	Muslim Para, Kuhalong	Bikrechara Muslim Para	Kuhalong	Bandarban Sadar
22	42	Muslim Para, Kuhalong	Bikrechara Muslim Para	Kuhalong	Bandarban Sadar
22	43	Muslim Para, Kuhalong	Bikrechara Muslim Para	Kuhalong	Bandarban Sadar
22	44	Muslim Para, Kuhalong	Bikrechara Muslim Para	Kuhalong	Bandarban Sadar
22	45	Muslim Para, Kuhalong	Bikrechara Muslim Para	Kuhalong	Bandarban Sadar
22	46	Muslim Para, Kuhalong	Bikrechara Muslim Para	Kuhalong	Bandarban Sadar
Date: 01/11/2015 Mro Group, Ampu Para, Bandarban Sadar
Vill	ID	Village name
23	01	Ampu Para, Bandarban Sadar	Ampu Para and Kaytong para and Ayuk para and Napang para and Patue para and Cini para	Tonkaboti	Bandarban Sadar	105
23	02	Ampu Para, Bandarban Sadar	Ampu Para and Kaytong para and Ayuk para and Napang para and Patue para and Cini para	Tonkaboti	Bandarban Sadar
23	03	Ampu Para, Bandarban Sadar	Ampu Para and Kaytong para and Ayuk para and Napang para and Patue para and Cini para	Tonkaboti	Bandarban Sadar
23	04	Ampu Para, Bandarban Sadar	Ampu Para and Kaytong para and Ayuk para and Napang para and Patue para and Cini para	Tonkaboti	Bandarban Sadar
23	05	Ampu Para, Bandarban Sadar	Ampu Para and Kaytong para and Ayuk para and Napang para and Patue para and Cini para	Tonkaboti	Bandarban Sadar
23	06	Ampu Para, Bandarban Sadar	Ampu Para and Kaytong para and Ayuk para and Napang para and Patue para and Cini para	Tonkaboti	Bandarban Sadar
23	07	Ampu Para, Bandarban Sadar	Ampu Para and Kaytong para and Ayuk para and Napang para and Patue para and Cini para	Tonkaboti	Bandarban Sadar
23	08	Ampu Para, Bandarban Sadar	Ampu Para and Kaytong para and Ayuk para and Napang para and Patue para and Cini para	Tonkaboti	Bandarban Sadar
23	09	Ampu Para, Bandarban Sadar	Ampu Para and Kaytong para and Ayuk para and Napang para and Patue para and Cini para	Tonkaboti	Bandarban Sadar
23	10	Ampu Para, Bandarban Sadar	Ampu Para and Kaytong para and Ayuk para and Napang para and Patue para and Cini para	Tonkaboti	Bandarban Sadar
23	11	Ampu Para, Bandarban Sadar	Ampu Para and Kaytong para and Ayuk para and Napang para and Patue para and Cini para	Tonkaboti	Bandarban Sadar
23	12	Ampu Para, Bandarban Sadar	Ampu Para and Kaytong para and Ayuk para and Napang para and Patue para and Cini para	Tonkaboti	Bandarban Sadar
23	13	Ampu Para, Bandarban Sadar	Ampu Para and Kaytong para and Ayuk para and Napang para and Patue para and Cini para	Tonkaboti	Bandarban Sadar
23	14	Ampu Para, Bandarban Sadar	Ampu Para and Kaytong para and Ayuk para and Napang para and Patue para and Cini para	Tonkaboti	Bandarban Sadar
23	15	Ampu Para, Bandarban Sadar	Ampu Para and Kaytong para and Ayuk para and Napang para and Patue para and Cini para	Tonkaboti	Bandarban Sadar
23	16	Ampu Para, Bandarban Sadar	Ampu Para and Kaytong para and Ayuk para and Napang para and Patue para and Cini para	Tonkaboti	Bandarban Sadar
23	17	Ampu Para, Bandarban Sadar	Ampu Para and Kaytong para and Ayuk para and Napang para and Patue para and Cini para	Tonkaboti	Bandarban Sadar
23	18	Ampu Para, Bandarban Sadar	Ampu Para and Kaytong para and Ayuk para and Napang para and Patue para and Cini para	Tonkaboti	Bandarban Sadar
23	19	Ampu Para, Bandarban Sadar	Ampu Para and Kaytong para and Ayuk para and Napang para and Patue para and Cini para	Tonkaboti	Bandarban Sadar
23	20	Ampu Para, Bandarban Sadar	Ampu Para and Kaytong para and Ayuk para and Napang para and Patue para and Cini para	Tonkaboti	Bandarban Sadar
23	21	Ampu Para, Bandarban Sadar	Ampu Para and Kaytong para and Ayuk para and Napang para and Patue para and Cini para	Tonkaboti	Bandarban Sadar
23	22	Ampu Para, Bandarban Sadar	Ampu Para and Kaytong para and Ayuk para and Napang para and Patue para and Cini para	Tonkaboti	Bandarban Sadar
23	23	Ampu Para, Bandarban Sadar	Ampu Para and Kaytong para and Ayuk para and Napang para and Patue para and Cini para	Tonkaboti	Bandarban Sadar
23	24	Ampu Para, Bandarban Sadar	Ampu Para and Kaytong para and Ayuk para and Napang para and Patue para and Cini para	Tonkaboti	Bandarban Sadar
23	25	Ampu Para, Bandarban Sadar	Ampu Para and Kaytong para and Ayuk para and Napang para and Patue para and Cini para	Tonkaboti	Bandarban Sadar
23	26	Ampu Para, Bandarban Sadar	Ampu Para and Kaytong para and Ayuk para and Napang para and Patue para and Cini para	Tonkaboti	Bandarban Sadar
23	27	Ampu Para, Bandarban Sadar	Ampu Para and Kaytong para and Ayuk para and Napang para and Patue para and Cini para	Tonkaboti	Bandarban Sadar
23	28	Ampu Para, Bandarban Sadar	Ampu Para and Kaytong para and Ayuk para and Napang para and Patue para and Cini para	Tonkaboti	Bandarban Sadar
23	29	Ampu Para, Bandarban Sadar	Ampu Para and Kaytong para and Ayuk para and Napang para and Patue para and Cini para	Tonkaboti	Bandarban Sadar
23	30	Ampu Para, Bandarban Sadar	Ampu Para and Kaytong para and Ayuk para and Napang para and Patue para and Cini para	Tonkaboti	Bandarban Sadar
23	31	Ampu Para, Bandarban Sadar	Ampu Para and Kaytong para and Ayuk para and Napang para and Patue para and Cini para	Tonkaboti	Bandarban Sadar
23	32	Ampu Para, Bandarban Sadar	Ampu Para and Kaytong para and Ayuk para and Napang para and Patue para and Cini para	Tonkaboti	Bandarban Sadar
23	33	Ampu Para, Bandarban Sadar	Ampu Para and Kaytong para and Ayuk para and Napang para and Patue para and Cini para	Tonkaboti	Bandarban Sadar
23	34	Ampu Para, Bandarban Sadar	Ampu Para and Kaytong para and Ayuk para and Napang para and Patue para and Cini para	Tonkaboti	Bandarban Sadar
23	35	Ampu Para, Bandarban Sadar	Ampu Para and Kaytong para and Ayuk para and Napang para and Patue para and Cini para	Tonkaboti	Bandarban Sadar
23	36	Ampu Para, Bandarban Sadar	Ampu Para and Kaytong para and Ayuk para and Napang para and Patue para and Cini para	Tonkaboti	Bandarban Sadar
23	37	Ampu Para, Bandarban Sadar	Ampu Para and Kaytong para and Ayuk para and Napang para and Patue para and Cini para	Tonkaboti	Bandarban Sadar
23	38	Ampu Para, Bandarban Sadar	Ampu Para and Kaytong para and Ayuk para and Napang para and Patue para and Cini para	Tonkaboti	Bandarban Sadar
23	39	Ampu Para, Bandarban Sadar	Ampu Para and Kaytong para and Ayuk para and Napang para and Patue para and Cini para	Tonkaboti	Bandarban Sadar
23	40	Ampu Para, Bandarban Sadar	Ampu Para and Kaytong para and Ayuk para and Napang para and Patue para and Cini para	Tonkaboti	Bandarban Sadar
23	41	Ampu Para, Bandarban Sadar	Ampu Para and Kaytong para and Ayuk para and Napang para and Patue para and Cini para	Tonkaboti	Bandarban Sadar
23	42	Ampu Para, Bandarban Sadar	Ampu Para and Kaytong para and Ayuk para and Napang para and Patue para and Cini para	Tonkaboti	Bandarban Sadar
23	43	Ampu Para, Bandarban Sadar	Ampu Para and Kaytong para and Ayuk para and Napang para and Patue para and Cini para	Tonkaboti	Bandarban Sadar
23	44	Ampu Para, Bandarban Sadar	Ampu Para and Kaytong para and Ayuk para and Napang para and Patue para and Cini para	Tonkaboti	Bandarban Sadar
23	45	Ampu Para, Bandarban Sadar	Ampu Para and Kaytong para and Ayuk para and Napang para and Patue para and Cini para	Tonkaboti	Bandarban Sadar
23	46	Ampu Para, Bandarban Sadar	Ampu Para and Kaytong para and Ayuk para and Napang para and Patue para and Cini para	Tonkaboti	Bandarban Sadar
23	47	Ampu Para, Bandarban Sadar	Ampu Para and Kaytong para and Ayuk para and Napang para and Patue para and Cini para	Tonkaboti	Bandarban Sadar
23	48	Ampu Para, Bandarban Sadar	Ampu Para and Kaytong para and Ayuk para and Napang para and Patue para and Cini para	Tonkaboti	Bandarban Sadar
23	49	Ampu Para, Bandarban Sadar	Ampu Para and Kaytong para and Ayuk para and Napang para and Patue para and Cini para	Tonkaboti	Bandarban Sadar
23	50	Ampu Para, Bandarban Sadar	Ampu Para and Kaytong para and Ayuk para and Napang para and Patue para and Cini para	Tonkaboti	Bandarban Sadar
23	51	Ampu Para, Bandarban Sadar	Ampu Para and Kaytong para and Ayuk para and Napang para and Patue para and Cini para	Tonkaboti	Bandarban Sadar
23	52	Ampu Para, Bandarban Sadar	Ampu Para and Kaytong para and Ayuk para and Napang para and Patue para and Cini para	Tonkaboti	Bandarban Sadar
23	53	Ampu Para, Bandarban Sadar	Ampu Para and Kaytong para and Ayuk para and Napang para and Patue para and Cini para	Tonkaboti	Bandarban Sadar
23	54	Ampu Para, Bandarban Sadar	Ampu Para and Kaytong para and Ayuk para and Napang para and Patue para and Cini para	Tonkaboti	Bandarban Sadar
23	55	Ampu Para, Bandarban Sadar	Ampu Para and Kaytong para and Ayuk para and Napang para and Patue para and Cini para	Tonkaboti	Bandarban Sadar
23	56	Ampu Para, Bandarban Sadar	Ampu Para and Kaytong para and Ayuk para and Napang para and Patue para and Cini para	Tonkaboti	Bandarban Sadar
23	57	Ampu Para, Bandarban Sadar	Ampu Para and Kaytong para and Ayuk para and Napang para and Patue para and Cini para	Tonkaboti	Bandarban Sadar
23	58	Ampu Para, Bandarban Sadar	Ampu Para and Kaytong para and Ayuk para and Napang para and Patue para and Cini para	Tonkaboti	Bandarban Sadar
23	59	Ampu Para, Bandarban Sadar	Ampu Para and Kaytong para and Ayuk para and Napang para and Patue para and Cini para	Tonkaboti	Bandarban Sadar
23	60	Ampu Para, Bandarban Sadar	Ampu Para and Kaytong para and Ayuk para and Napang para and Patue para and Cini para	Tonkaboti	Bandarban Sadar
23	61	Ampu Para, Bandarban Sadar	Ampu Para and Kaytong para and Ayuk para and Napang para and Patue para and Cini para	Tonkaboti	Bandarban Sadar
23	62	Ampu Para, Bandarban Sadar	Ampu Para and Kaytong para and Ayuk para and Napang para and Patue para and Cini para	Tonkaboti	Bandarban Sadar
23	63	Ampu Para, Bandarban Sadar	Ampu Para and Kaytong para and Ayuk para and Napang para and Patue para and Cini para	Tonkaboti	Bandarban Sadar
23	64	Ampu Para, Bandarban Sadar	Ampu Para and Kaytong para and Ayuk para and Napang para and Patue para and Cini para	Tonkaboti	Bandarban Sadar
23	65	Ampu Para, Bandarban Sadar	Ampu Para and Kaytong para and Ayuk para and Napang para and Patue para and Cini para	Tonkaboti	Bandarban Sadar
23	66	Ampu Para, Bandarban Sadar	Ampu Para and Kaytong para and Ayuk para and Napang para and Patue para and Cini para	Tonkaboti	Bandarban Sadar
23	67	Ampu Para, Bandarban Sadar	Ampu Para and Kaytong para and Ayuk para and Napang para and Patue para and Cini para	Tonkaboti	Bandarban Sadar
23	68	Ampu Para, Bandarban Sadar	Ampu Para and Kaytong para and Ayuk para and Napang para and Patue para and Cini para	Tonkaboti	Bandarban Sadar
23	69	Ampu Para, Bandarban Sadar	Ampu Para and Kaytong para and Ayuk para and Napang para and Patue para and Cini para	Tonkaboti	Bandarban Sadar
23	70	Ampu Para, Bandarban Sadar	Ampu Para and Kaytong para and Ayuk para and Napang para and Patue para and Cini para	Tonkaboti	Bandarban Sadar
23	71	Ampu Para, Bandarban Sadar	Ampu Para and Kaytong para and Ayuk para and Napang para and Patue para and Cini para	Tonkaboti	Bandarban Sadar
23	72	Ampu Para, Bandarban Sadar	Ampu Para and Kaytong para and Ayuk para and Napang para and Patue para and Cini para	Tonkaboti	Bandarban Sadar
23	73	Ampu Para, Bandarban Sadar	Ampu Para and Kaytong para and Ayuk para and Napang para and Patue para and Cini para	Tonkaboti	Bandarban Sadar
23	74	Ampu Para, Bandarban Sadar	Ampu Para and Kaytong para and Ayuk para and Napang para and Patue para and Cini para	Tonkaboti	Bandarban Sadar
23	75	Ampu Para, Bandarban Sadar	Ampu Para and Kaytong para and Ayuk para and Napang para and Patue para and Cini para	Tonkaboti	Bandarban Sadar
23	76	Ampu Para, Bandarban Sadar	Ampu Para and Kaytong para and Ayuk para and Napang para and Patue para and Cini para	Tonkaboti	Bandarban Sadar
23	77	Ampu Para, Bandarban Sadar	Ampu Para and Kaytong para and Ayuk para and Napang para and Patue para and Cini para	Tonkaboti	Bandarban Sadar
23	78	Ampu Para, Bandarban Sadar	Ampu Para and Kaytong para and Ayuk para and Napang para and Patue para and Cini para	Tonkaboti	Bandarban Sadar
23	79	Ampu Para, Bandarban Sadar	Ampu Para and Kaytong para and Ayuk para and Napang para and Patue para and Cini para	Tonkaboti	Bandarban Sadar
23	80	Ampu Para, Bandarban Sadar	Ampu Para and Kaytong para and Ayuk para and Napang para and Patue para and Cini para	Tonkaboti	Bandarban Sadar
23	81	Ampu Para, Bandarban Sadar	Ampu Para and Kaytong para and Ayuk para and Napang para and Patue para and Cini para	Tonkaboti	Bandarban Sadar
23	82	Ampu Para, Bandarban Sadar	Ampu Para and Kaytong para and Ayuk para and Napang para and Patue para and Cini para	Tonkaboti	Bandarban Sadar
23	83	Ampu Para, Bandarban Sadar	Ampu Para and Kaytong para and Ayuk para and Napang para and Patue para and Cini para	Tonkaboti	Bandarban Sadar
23	84	Ampu Para, Bandarban Sadar	Ampu Para and Kaytong para and Ayuk para and Napang para and Patue para and Cini para	Tonkaboti	Bandarban Sadar
23	85	Ampu Para, Bandarban Sadar	Ampu Para and Kaytong para and Ayuk para and Napang para and Patue para and Cini para	Tonkaboti	Bandarban Sadar
23	86	Ampu Para, Bandarban Sadar	Ampu Para and Kaytong para and Ayuk para and Napang para and Patue para and Cini para	Tonkaboti	Bandarban Sadar
23	87	Ampu Para, Bandarban Sadar	Ampu Para and Kaytong para and Ayuk para and Napang para and Patue para and Cini para	Tonkaboti	Bandarban Sadar
23	88	Ampu Para, Bandarban Sadar	Ampu Para and Kaytong para and Ayuk para and Napang para and Patue para and Cini para	Tonkaboti	Bandarban Sadar
23	89	Ampu Para, Bandarban Sadar	Ampu Para and Kaytong para and Ayuk para and Napang para and Patue para and Cini para	Tonkaboti	Bandarban Sadar
23	90	Ampu Para, Bandarban Sadar	Ampu Para and Kaytong para and Ayuk para and Napang para and Patue para and Cini para	Tonkaboti	Bandarban Sadar
23	91	Ampu Para, Bandarban Sadar	Ampu Para and Kaytong para and Ayuk para and Napang para and Patue para and Cini para	Tonkaboti	Bandarban Sadar
23	92	Ampu Para, Bandarban Sadar	Ampu Para and Kaytong para and Ayuk para and Napang para and Patue para and Cini para	Tonkaboti	Bandarban Sadar
23	93	Ampu Para, Bandarban Sadar	Ampu Para and Kaytong para and Ayuk para and Napang para and Patue para and Cini para	Tonkaboti	Bandarban Sadar
23	94	Ampu Para, Bandarban Sadar	Ampu Para and Kaytong para and Ayuk para and Napang para and Patue para and Cini para	Tonkaboti	Bandarban Sadar
23	95	Ampu Para, Bandarban Sadar	Ampu Para and Kaytong para and Ayuk para and Napang para and Patue para and Cini para	Tonkaboti	Bandarban Sadar
23	96	Ampu Para, Bandarban Sadar	Ampu Para and Kaytong para and Ayuk para and Napang para and Patue para and Cini para	Tonkaboti	Bandarban Sadar
23	97	Ampu Para, Bandarban Sadar	Ampu Para and Kaytong para and Ayuk para and Napang para and Patue para and Cini para	Tonkaboti	Bandarban Sadar
23	98	Ampu Para, Bandarban Sadar	Ampu Para and Kaytong para and Ayuk para and Napang para and Patue para and Cini para	Tonkaboti	Bandarban Sadar
23	99	Ampu Para, Bandarban Sadar	Ampu Para and Kaytong para and Ayuk para and Napang para and Patue para and Cini para	Tonkaboti	Bandarban Sadar
23	00	Ampu Para, Bandarban Sadar	Ampu Para and Kaytong para and Ayuk para and Napang para and Patue para and Cini para	Tonkaboti	Bandarban Sadar
Date: 08/11/2015 Khumi Group, Murungu Bazar, Rowangchari
Vill	ID	Village name
24	01	Murungu Bazar, Rowangchari	Aung tong and Chang king and and Langthang and Patuai para	Tarachha	Rowangchari	66
24	02	Murungu Bazar, Rowangchari	Aung tong and Chang king and and Langthang and Patuai para	Tarachha	Rowangchari
24	03	Murungu Bazar, Rowangchari	Aung tong and Chang king and and Langthang and Patuai para	Tarachha	Rowangchari
24	04	Murungu Bazar, Rowangchari	Aung tong and Chang king and and Langthang and Patuai para	Tarachha	Rowangchari
24	05	Murungu Bazar, Rowangchari	Aung tong and Chang king and and Langthang and Patuai para	Tarachha	Rowangchari
24	06	Murungu Bazar, Rowangchari	Aung tong and Chang king and and Langthang and Patuai para	Tarachha	Rowangchari
24	07	Murungu Bazar, Rowangchari	Aung tong and Chang king and and Langthang and Patuai para	Tarachha	Rowangchari
24	08	Murungu Bazar, Rowangchari	Aung tong and Chang king and and Langthang and Patuai para	Tarachha	Rowangchari
24	09	Murungu Bazar, Rowangchari	Aung tong and Chang king and and Langthang and Patuai para	Tarachha	Rowangchari
24	10	Murungu Bazar, Rowangchari	Aung tong and Chang king and and Langthang and Patuai para	Tarachha	Rowangchari
24	11	Murungu Bazar, Rowangchari	Aung tong and Chang king and and Langthang and Patuai para	Tarachha	Rowangchari
24	12	Murungu Bazar, Rowangchari	Aung tong and Chang king and and Langthang and Patuai para	Tarachha	Rowangchari
24	13	Murungu Bazar, Rowangchari	Aung tong and Chang king and and Langthang and Patuai para	Tarachha	Rowangchari
24	14	Murungu Bazar, Rowangchari	Aung tong and Chang king and and Langthang and Patuai para	Tarachha	Rowangchari
24	15	Murungu Bazar, Rowangchari	Aung tong and Chang king and and Langthang and Patuai para	Tarachha	Rowangchari
24	16	Murungu Bazar, Rowangchari	Aung tong and Chang king and and Langthang and Patuai para	Tarachha	Rowangchari
24	17	Murungu Bazar, Rowangchari	Aung tong and Chang king and and Langthang and Patuai para	Tarachha	Rowangchari
24	18	Murungu Bazar, Rowangchari	Aung tong and Chang king and and Langthang and Patuai para	Tarachha	Rowangchari
24	19	Murungu Bazar, Rowangchari	Aung tong and Chang king and and Langthang and Patuai para	Tarachha	Rowangchari
24	20	Murungu Bazar, Rowangchari	Aung tong and Chang king and and Langthang and Patuai para	Tarachha	Rowangchari
24	21	Murungu Bazar, Rowangchari	Aung tong and Chang king and and Langthang and Patuai para	Tarachha	Rowangchari
24	22	Murungu Bazar, Rowangchari	Aung tong and Chang king and and Langthang and Patuai para	Tarachha	Rowangchari
24	23	Murungu Bazar, Rowangchari	Aung tong and Chang king and and Langthang and Patuai para	Tarachha	Rowangchari
24	24	Murungu Bazar, Rowangchari	Aung tong and Chang king and and Langthang and Patuai para	Tarachha	Rowangchari
24	25	Murungu Bazar, Rowangchari	Aung tong and Chang king and and Langthang and Patuai para	Tarachha	Rowangchari
24	26	Murungu Bazar, Rowangchari	Aung tong and Chang king and and Langthang and Patuai para	Tarachha	Rowangchari
24	27	Murungu Bazar, Rowangchari	Aung tong and Chang king and and Langthang and Patuai para	Tarachha	Rowangchari
24	28	Murungu Bazar, Rowangchari	Aung tong and Chang king and and Langthang and Patuai para	Tarachha	Rowangchari
24	29	Murungu Bazar, Rowangchari	Aung tong and Chang king and and Langthang and Patuai para	Tarachha	Rowangchari
24	30	Murungu Bazar, Rowangchari	Aung tong and Chang king and and Langthang and Patuai para	Tarachha	Rowangchari
24	31	Murungu Bazar, Rowangchari	Aung tong and Chang king and and Langthang and Patuai para	Tarachha	Rowangchari
24	32	Murungu Bazar, Rowangchari	Aung tong and Chang king and and Langthang and Patuai para	Tarachha	Rowangchari
24	33	Murungu Bazar, Rowangchari	Aung tong and Chang king and and Langthang and Patuai para	Tarachha	Rowangchari
24	34	Murungu Bazar, Rowangchari	Aung tong and Chang king and and Langthang and Patuai para	Tarachha	Rowangchari
24	35	Murungu Bazar, Rowangchari	Aung tong and Chang king and and Langthang and Patuai para	Tarachha	Rowangchari
24	36	Murungu Bazar, Rowangchari	Aung tong and Chang king and and Langthang and Patuai para	Tarachha	Rowangchari
24	37	Murungu Bazar, Rowangchari	Aung tong and Chang king and and Langthang and Patuai para	Tarachha	Rowangchari
24	38	Murungu Bazar, Rowangchari	Aung tong and Chang king and and Langthang and Patuai para	Tarachha	Rowangchari
24	39	Murungu Bazar, Rowangchari	Aung tong and Chang king and and Langthang and Patuai para	Tarachha	Rowangchari
24	40	Murungu Bazar, Rowangchari	Aung tong and Chang king and and Langthang and Patuai para	Tarachha	Rowangchari
24	41	Murungu Bazar, Rowangchari	Aung tong and Chang king and and Langthang and Patuai para	Tarachha	Rowangchari
24	42	Murungu Bazar, Rowangchari	Aung tong and Chang king and and Langthang and Patuai para	Tarachha	Rowangchari
24	43	Murungu Bazar, Rowangchari	Aung tong and Chang king and and Langthang and Patuai para	Tarachha	Rowangchari
24	44	Murungu Bazar, Rowangchari	Aung tong and Chang king and and Langthang and Patuai para	Tarachha	Rowangchari
24	45	Murungu Bazar, Rowangchari	Aung tong and Chang king and and Langthang and Patuai para	Tarachha	Rowangchari
24	46	Murungu Bazar, Rowangchari	Aung tong and Chang king and and Langthang and Patuai para	Tarachha	Rowangchari
24	47	Murungu Bazar, Rowangchari	Aung tong and Chang king and and Langthang and Patuai para	Tarachha	Rowangchari
24	48	Murungu Bazar, Rowangchari	Aung tong and Chang king and and Langthang and Patuai para	Tarachha	Rowangchari
24	49	Murungu Bazar, Rowangchari	Aung tong and Chang king and and Langthang and Patuai para	Tarachha	Rowangchari
24	50	Murungu Bazar, Rowangchari	Aung tong and Chang king and and Langthang and Patuai para	Tarachha	Rowangchari
24	51	Murungu Bazar, Rowangchari	Aung tong and Chang king and and Langthang and Patuai para	Tarachha	Rowangchari
Date: 09/11/2015 Khumi Group, Ramzadi Para, Bandarban Sadar
Vill	ID	Village name
25	01	Ramzadi Para, Bandarban Sadar	Rajar khamar para	Taracha	Rowangchari	47
25	02	Ramzadi Para, Bandarban Sadar	Rajar khamar para	Taracha	Rowangchari
25	03	Ramzadi Para, Bandarban Sadar	Rajar khamar para	Taracha	Rowangchari
25	04	Ramzadi Para, Bandarban Sadar	Rajar khamar para	Taracha	Rowangchari
25	05	Ramzadi Para, Bandarban Sadar	Rajar khamar para	Taracha	Rowangchari
25	06	Ramzadi Para, Bandarban Sadar	Rajar khamar para	Taracha	Rowangchari
25	07	Ramzadi Para, Bandarban Sadar	Rajar khamar para	Taracha	Rowangchari
25	08	Ramzadi Para, Bandarban Sadar	Rajar khamar para	Taracha	Rowangchari
25	09	Ramzadi Para, Bandarban Sadar	Rajar khamar para	Taracha	Rowangchari
25	10	Ramzadi Para, Bandarban Sadar	Rajar khamar para	Taracha	Rowangchari
Date: 09/11/2015 Chakma Group, Cray Khong Para, Rajbila
Vill	ID	Village name
25	11	Cray Khong Para, Rajbila	Kalicharan para	Rajbila	Bandarban Sadar	12
25	12	Cray Khong Para, Rajbila	Kalicharan para	Rajbila	Bandarban Sadar
25	13	Cray Khong Para, Rajbila	Kalicharan para	Rajbila	Bandarban Sadar
25	14	Cray Khong Para, Rajbila	Kalicharan para	Rajbila	Bandarban Sadar
25	15	Cray Khong Para, Rajbila	Kalicharan para	Rajbila	Bandarban Sadar
25	16	Cray Khong Para, Rajbila	Kalicharan para	Rajbila	Bandarban Sadar
25	17	Cray Khong Para, Rajbila	Kalicharan para	Rajbila	Bandarban Sadar
25	18	Cray Khong Para, Rajbila	Kalicharan para	Rajbila	Bandarban Sadar
25	19	Cray Khong Para, Rajbila	Kalicharan para	Rajbila	Bandarban Sadar
Date: 14/11/2015 Chak Group, Chak Headman Para, Naikhongchari Sadar
Vill	ID	Village name
26	01	Chak Headman Para, Nchari Sadar	Chak Headman Para and Notun Chak para and Moddhom chak para	Sadar union	Naikhyong chori	101
26	02	Chak Headman Para, Nchari Sadar	Chak Headman Para and Notun Chak para and Moddhom chak para	Sadar union	Naikhyong chori
26	03	Chak Headman Para, Nchari Sadar	Chak Headman Para and Notun Chak para and Moddhom chak para	Sadar union	Naikhyong chori
26	04	Chak Headman Para, Nchari Sadar	Chak Headman Para and Notun Chak para and Moddhom chak para	Sadar union	Naikhyong chori
26	05	Chak Headman Para, Nchari Sadar	Chak Headman Para and Notun Chak para and Moddhom chak para	Sadar union	Naikhyong chori
26	06	Chak Headman Para, Nchari Sadar	Chak Headman Para and Notun Chak para and Moddhom chak para	Sadar union	Naikhyong chori
26	07	Chak Headman Para, Nchari Sadar	Chak Headman Para and Notun Chak para and Moddhom chak para	Sadar union	Naikhyong chori
26	08	Chak Headman Para, Nchari Sadar	Chak Headman Para and Notun Chak para and Moddhom chak para	Sadar union	Naikhyong chori
26	09	Chak Headman Para, Nchari Sadar	Chak Headman Para and Notun Chak para and Moddhom chak para	Sadar union	Naikhyong chori
26	10	Chak Headman Para, Nchari Sadar	Chak Headman Para and Notun Chak para and Moddhom chak para	Sadar union	Naikhyong chori
26	11	Chak Headman Para, Nchari Sadar	Chak Headman Para and Notun Chak para and Moddhom chak para	Sadar union	Naikhyong chori
26	12	Chak Headman Para, Nchari Sadar	Chak Headman Para and Notun Chak para and Moddhom chak para	Sadar union	Naikhyong chori
26	13	Chak Headman Para, Nchari Sadar	Chak Headman Para and Notun Chak para and Moddhom chak para	Sadar union	Naikhyong chori
26	14	Chak Headman Para, Nchari Sadar	Chak Headman Para and Notun Chak para and Moddhom chak para	Sadar union	Naikhyong chori
26	15	Chak Headman Para, Nchari Sadar	Chak Headman Para and Notun Chak para and Moddhom chak para	Sadar union	Naikhyong chori
26	16	Chak Headman Para, Nchari Sadar	Chak Headman Para and Notun Chak para and Moddhom chak para	Sadar union	Naikhyong chori
26	17	Chak Headman Para, Nchari Sadar	Chak Headman Para and Notun Chak para and Moddhom chak para	Sadar union	Naikhyong chori
26	18	Chak Headman Para, Nchari Sadar	Chak Headman Para and Notun Chak para and Moddhom chak para	Sadar union	Naikhyong chori
26	19	Chak Headman Para, Nchari Sadar	Chak Headman Para and Notun Chak para and Moddhom chak para	Sadar union	Naikhyong chori
26	20	Chak Headman Para, Nchari Sadar	Chak Headman Para and Notun Chak para and Moddhom chak para	Sadar union	Naikhyong chori
26	21	Chak Headman Para, Nchari Sadar	Chak Headman Para and Notun Chak para and Moddhom chak para	Sadar union	Naikhyong chori
26	22	Chak Headman Para, Nchari Sadar	Chak Headman Para and Notun Chak para and Moddhom chak para	Sadar union	Naikhyong chori
26	23	Chak Headman Para, Nchari Sadar	Chak Headman Para and Notun Chak para and Moddhom chak para	Sadar union	Naikhyong chori
26	24	Chak Headman Para, Nchari Sadar	Chak Headman Para and Notun Chak para and Moddhom chak para	Sadar union	Naikhyong chori
26	25	Chak Headman Para, Nchari Sadar	Chak Headman Para and Notun Chak para and Moddhom chak para	Sadar union	Naikhyong chori
26	26	Chak Headman Para, Nchari Sadar	Chak Headman Para and Notun Chak para and Moddhom chak para	Sadar union	Naikhyong chori
26	27	Chak Headman Para, Nchari Sadar	Chak Headman Para and Notun Chak para and Moddhom chak para	Sadar union	Naikhyong chori
26	28	Chak Headman Para, Nchari Sadar	Chak Headman Para and Notun Chak para and Moddhom chak para	Sadar union	Naikhyong chori
26	29	Chak Headman Para, Nchari Sadar	Chak Headman Para and Notun Chak para and Moddhom chak para	Sadar union	Naikhyong chori
26	30	Chak Headman Para, Nchari Sadar	Chak Headman Para and Notun Chak para and Moddhom chak para	Sadar union	Naikhyong chori
26	31	Chak Headman Para, Nchari Sadar	Chak Headman Para and Notun Chak para and Moddhom chak para	Sadar union	Naikhyong chori
26	32	Chak Headman Para, Nchari Sadar	Chak Headman Para and Notun Chak para and Moddhom chak para	Sadar union	Naikhyong chori
26	33	Chak Headman Para, Nchari Sadar	Chak Headman Para and Notun Chak para and Moddhom chak para	Sadar union	Naikhyong chori
26	34	Chak Headman Para, Nchari Sadar	Chak Headman Para and Notun Chak para and Moddhom chak para	Sadar union	Naikhyong chori
26	35	Chak Headman Para, Nchari Sadar	Chak Headman Para and Notun Chak para and Moddhom chak para	Sadar union	Naikhyong chori
26	36	Chak Headman Para, Nchari Sadar	Chak Headman Para and Notun Chak para and Moddhom chak para	Sadar union	Naikhyong chori
26	37	Chak Headman Para, Nchari Sadar	Chak Headman Para and Notun Chak para and Moddhom chak para	Sadar union	Naikhyong chori
26	38	Chak Headman Para, Nchari Sadar	Chak Headman Para and Notun Chak para and Moddhom chak para	Sadar union	Naikhyong chori
26	39	Chak Headman Para, Nchari Sadar	Chak Headman Para and Notun Chak para and Moddhom chak para	Sadar union	Naikhyong chori
26	40	Chak Headman Para, Nchari Sadar	Chak Headman Para and Notun Chak para and Moddhom chak para	Sadar union	Naikhyong chori
26	41	Chak Headman Para, Nchari Sadar	Chak Headman Para and Notun Chak para and Moddhom chak para	Sadar union	Naikhyong chori
26	42	Chak Headman Para, Nchari Sadar	Chak Headman Para and Notun Chak para and Moddhom chak para	Sadar union	Naikhyong chori
26	43	Chak Headman Para, Nchari Sadar	Chak Headman Para and Notun Chak para and Moddhom chak para	Sadar union	Naikhyong chori
26	44	Chak Headman Para, Nchari Sadar	Chak Headman Para and Notun Chak para and Moddhom chak para	Sadar union	Naikhyong chori
26	45	Chak Headman Para, Nchari Sadar	Chak Headman Para and Notun Chak para and Moddhom chak para	Sadar union	Naikhyong chori
26	46	Chak Headman Para, Nchari Sadar	Chak Headman Para and Notun Chak para and Moddhom chak para	Sadar union	Naikhyong chori
26	47	Chak Headman Para, Nchari Sadar	Chak Headman Para and Notun Chak para and Moddhom chak para	Sadar union	Naikhyong chori
26	48	Chak Headman Para, Nchari Sadar	Chak Headman Para and Notun Chak para and Moddhom chak para	Sadar union	Naikhyong chori
26	49	Chak Headman Para, Nchari Sadar	Chak Headman Para and Notun Chak para and Moddhom chak para	Sadar union	Naikhyong chori
26	50	Chak Headman Para, Nchari Sadar	Chak Headman Para and Notun Chak para and Moddhom chak para	Sadar union	Naikhyong chori
26	51	Chak Headman Para, Nchari Sadar	Chak Headman Para and Notun Chak para and Moddhom chak para	Sadar union	Naikhyong chori
26	52	Chak Headman Para, Nchari Sadar	Chak Headman Para and Notun Chak para and Moddhom chak para	Sadar union	Naikhyong chori
26	53	Chak Headman Para, Nchari Sadar	Chak Headman Para and Notun Chak para and Moddhom chak para	Sadar union	Naikhyong chori
26	54	Chak Headman Para, Nchari Sadar	Chak Headman Para and Notun Chak para and Moddhom chak para	Sadar union	Naikhyong chori
26	55	Chak Headman Para, Nchari Sadar	Chak Headman Para and Notun Chak para and Moddhom chak para	Sadar union	Naikhyong chori
26	56	Chak Headman Para, Nchari Sadar	Chak Headman Para and Notun Chak para and Moddhom chak para	Sadar union	Naikhyong chori
26	57	Chak Headman Para, Nchari Sadar	Chak Headman Para and Notun Chak para and Moddhom chak para	Sadar union	Naikhyong chori
26	58	Chak Headman Para, Nchari Sadar	Chak Headman Para and Notun Chak para and Moddhom chak para	Sadar union	Naikhyong chori
26	59	Chak Headman Para, Nchari Sadar	Chak Headman Para and Notun Chak para and Moddhom chak para	Sadar union	Naikhyong chori
26	60	Chak Headman Para, Nchari Sadar	Chak Headman Para and Notun Chak para and Moddhom chak para	Sadar union	Naikhyong chori
26	61	Chak Headman Para, Nchari Sadar	Chak Headman Para and Notun Chak para and Moddhom chak para	Sadar union	Naikhyong chori
26	62	Chak Headman Para, Nchari Sadar	Chak Headman Para and Notun Chak para and Moddhom chak para	Sadar union	Naikhyong chori
26	63	Chak Headman Para, Nchari Sadar	Chak Headman Para and Notun Chak para and Moddhom chak para	Sadar union	Naikhyong chori
26	64	Chak Headman Para, Nchari Sadar	Chak Headman Para and Notun Chak para and Moddhom chak para	Sadar union	Naikhyong chori
26	65	Chak Headman Para, Nchari Sadar	Chak Headman Para and Notun Chak para and Moddhom chak para	Sadar union	Naikhyong chori
26	66	Chak Headman Para, Nchari Sadar	Chak Headman Para and Notun Chak para and Moddhom chak para	Sadar union	Naikhyong chori
26	67	Chak Headman Para, Nchari Sadar	Chak Headman Para and Notun Chak para and Moddhom chak para	Sadar union	Naikhyong chori
26	68	Chak Headman Para, Nchari Sadar	Chak Headman Para and Notun Chak para and Moddhom chak para	Sadar union	Naikhyong chori
26	69	Chak Headman Para, Nchari Sadar	Chak Headman Para and Notun Chak para and Moddhom chak para	Sadar union	Naikhyong chori
26	70	Chak Headman Para, Nchari Sadar	Chak Headman Para and Notun Chak para and Moddhom chak para	Sadar union	Naikhyong chori
26	71	Chak Headman Para, Nchari Sadar	Chak Headman Para and Notun Chak para and Moddhom chak para	Sadar union	Naikhyong chori
26	72	Chak Headman Para, Nchari Sadar	Chak Headman Para and Notun Chak para and Moddhom chak para	Sadar union	Naikhyong chori
26	73	Chak Headman Para, Nchari Sadar	Chak Headman Para and Notun Chak para and Moddhom chak para	Sadar union	Naikhyong chori
26	74	Chak Headman Para, Nchari Sadar	Chak Headman Para and Notun Chak para and Moddhom chak para	Sadar union	Naikhyong chori
26	75	Chak Headman Para, Nchari Sadar	Chak Headman Para and Notun Chak para and Moddhom chak para	Sadar union	Naikhyong chori
26	76	Chak Headman Para, Nchari Sadar	Chak Headman Para and Notun Chak para and Moddhom chak para	Sadar union	Naikhyong chori
26	77	Chak Headman Para, Nchari Sadar	Chak Headman Para and Notun Chak para and Moddhom chak para	Sadar union	Naikhyong chori
26	78	Chak Headman Para, Nchari Sadar	Chak Headman Para and Notun Chak para and Moddhom chak para	Sadar union	Naikhyong chori
26	79	Chak Headman Para, Nchari Sadar	Chak Headman Para and Notun Chak para and Moddhom chak para	Sadar union	Naikhyong chori
26	80	Chak Headman Para, Nchari Sadar	Chak Headman Para and Notun Chak para and Moddhom chak para	Sadar union	Naikhyong chori
26	81	Chak Headman Para, Nchari Sadar	Chak Headman Para and Notun Chak para and Moddhom chak para	Sadar union	Naikhyong chori
26	82	Chak Headman Para, Nchari Sadar	Chak Headman Para and Notun Chak para and Moddhom chak para	Sadar union	Naikhyong chori
26	83	Chak Headman Para, Nchari Sadar	Chak Headman Para and Notun Chak para and Moddhom chak para	Sadar union	Naikhyong chori
Date: 07/12/2015 Khumi Group, Masim Hostel, Tindu, Thanchi
Vill	ID	Village name
27	01	Masim Hostel, Tindu, Thanchi	Manglung headman para and Koaung para	Tindu	Thanchi	36
27	02	Masim Hostel, Tindu, Thanchi	Manglung headman para and Koaung para	Tindu	Thanchi
27	03	Masim Hostel, Tindu, Thanchi	Manglung headman para and Koaung para	Tindu	Thanchi
27	04	Masim Hostel, Tindu, Thanchi	Manglung headman para and Koaung para	Tindu	Thanchi
27	05	Masim Hostel, Tindu, Thanchi	Manglung headman para and Koaung para	Tindu	Thanchi
27	06	Masim Hostel, Tindu, Thanchi	Manglung headman para and Koaung para	Tindu	Thanchi
27	07	Masim Hostel, Tindu, Thanchi	Manglung headman para and Koaung para	Tindu	Thanchi
27	08	Masim Hostel, Tindu, Thanchi	Manglung headman para and Koaung para	Tindu	Thanchi
27	09	Masim Hostel, Tindu, Thanchi	Manglung headman para and Koaung para	Tindu	Thanchi
27	10	Masim Hostel, Tindu, Thanchi	Manglung headman para and Koaung para	Tindu	Thanchi
27	11	Masim Hostel, Tindu, Thanchi	Manglung headman para and Koaung para	Tindu	Thanchi
27	12	Masim Hostel, Tindu, Thanchi	Manglung headman para and Koaung para	Tindu	Thanchi
27	13	Masim Hostel, Tindu, Thanchi	Manglung headman para and Koaung para	Tindu	Thanchi
27	14	Masim Hostel, Tindu, Thanchi	Manglung headman para and Koaung para	Tindu	Thanchi
27	15	Masim Hostel, Tindu, Thanchi	Manglung headman para and Koaung para	Tindu	Thanchi
27	16	Masim Hostel, Tindu, Thanchi	Manglung headman para and Koaung para	Tindu	Thanchi
27	17	Masim Hostel, Tindu, Thanchi	Manglung headman para and Koaung para	Tindu	Thanchi
27	18	Masim Hostel, Tindu, Thanchi	Manglung headman para and Koaung para	Tindu	Thanchi
27	19	Masim Hostel, Tindu, Thanchi	Manglung headman para and Koaung para	Tindu	Thanchi
27	20	Masim Hostel, Tindu, Thanchi	Manglung headman para and Koaung para	Tindu	Thanchi
27	21	Masim Hostel, Tindu, Thanchi	Manglung headman para and Koaung para	Tindu	Thanchi
27	22	Masim Hostel, Tindu, Thanchi	Manglung headman para and Koaung para	Tindu	Thanchi
27	23	Masim Hostel, Tindu, Thanchi	Manglung headman para and Koaung para	Tindu	Thanchi
27	24	Masim Hostel, Tindu, Thanchi	Manglung headman para and Koaung para	Tindu	Thanchi
27	25	Masim Hostel, Tindu, Thanchi	Manglung headman para and Koaung para	Tindu	Thanchi
27	26	Masim Hostel, Tindu, Thanchi	Manglung headman para and Koaung para	Tindu	Thanchi
27	27	Masim Hostel, Tindu, Thanchi	Manglung headman para and Koaung para	Tindu	Thanchi
27	28	Masim Hostel, Tindu, Thanchi	Manglung headman para and Koaung para	Tindu	Thanchi
27	29	Masim Hostel, Tindu, Thanchi	Manglung headman para and Koaung para	Tindu	Thanchi
27	30	Masim Hostel, Tindu, Thanchi	Manglung headman para and Koaung para	Tindu	Thanchi
27	31	Masim Hostel, Tindu, Thanchi	Manglung headman para and Koaung para	Tindu	Thanchi
27	32	Masim Hostel, Tindu, Thanchi	Manglung headman para and Koaung para	Tindu	Thanchi
27	33	Masim Hostel, Tindu, Thanchi	Manglung headman para and Koaung para	Tindu	Thanchi
Date: 11/01/2016 Khumi Group , Bandarban Khumi Hostel & Pourashova
Vill	ID	Village name
28	01	Bban Khumi Hostel & Pourashova	Rajar khamar para	Taracha	Rowangchari	47
28	02	Bban Khumi Hostel & Pourashova	Rajar khamar para	Taracha	Rowangchari
28	03	Bban Khumi Hostel & Pourashova	Rajar khamar para	Taracha	Rowangchari
28	04	Bban Khumi Hostel & Pourashova	Rajar khamar para	Taracha	Rowangchari
28	05	Bban Khumi Hostel & Pourashova	Rajar khamar para	Taracha	Rowangchari
28	06	Bban Khumi Hostel & Pourashova	Rajar khamar para	Taracha	Rowangchari
28	07	Bban Khumi Hostel & Pourashova	Rajar khamar para	Taracha	Rowangchari
28	08	Bban Khumi Hostel & Pourashova	Rajar khamar para	Taracha	Rowangchari
28	09	Bban Khumi Hostel & Pourashova	Rajar khamar para	Taracha	Rowangchari
28	10	Bban Khumi Hostel & Pourashova	Rajar khamar para	Taracha	Rowangchari
28	11	Bban Khumi Hostel & Pourashova	Rajar khamar para	Taracha	Rowangchari
28	12	Bban Khumi Hostel & Pourashova	Rajar khamar para	Taracha	Rowangchari
28	13	Bban Khumi Hostel & Pourashova	Rajar khamar para	Taracha	Rowangchari
28	14	Bban Khumi Hostel & Pourashova	Rajar khamar para	Taracha	Rowangchari
28	15	Bban Khumi Hostel & Pourashova	Rajar khamar para	Taracha	Rowangchari
28	16	Bban Khumi Hostel & Pourashova	Rajar khamar para	Taracha	Rowangchari
28	17	Bban Khumi Hostel & Pourashova	Rajar khamar para	Taracha	Rowangchari
28	18	Bban Khumi Hostel & Pourashova	Rajar khamar para	Taracha	Rowangchari
28	19	Bban Khumi Hostel & Pourashova	Rajar khamar para	Taracha	Rowangchari
28	20	Bban Khumi Hostel & Pourashova	Rajar khamar para	Taracha	Rowangchari
28	21	Bban Khumi Hostel & Pourashova	Rajar khamar para	Taracha	Rowangchari
28	22	Bban Khumi Hostel & Pourashova	Rajar khamar para	Taracha	Rowangchari
28	23	Bban Khumi Hostel & Pourashova	Rajar khamar para	Taracha	Rowangchari
